# Supplementary material for: Overdispersed gene expression in schizophrenia
Source: PubMed Central journal article supplement (PMC7125213; doi:10.1038/s41537-020-0097-5), 2020-04-03
Supplement: 41537_2020_97_MOESM1_ESM.pdf [file 41537_2020_97_MOESM1_ESM.pdf]

# Supplementary Information

## Overdispersed gene expression in schizophrenia

Guangzao Huang<sup>1,2,§,†</sup>, Daniel Osorio<sup>3,§</sup>, Jinting Guan<sup>1,2</sup>, Guoli Ji<sup>1,2,4,\*</sup> and James J. Cai<sup>3,5,6,\*</sup>

<sup>1</sup> Department of Automation, Xiamen University, Xiamen 361005, China

<sup>2</sup> National Institute for Data Science in Health and Medicine, Xiamen University, Xiamen 361005, China

<sup>3</sup> Department of Veterinary Integrative Biosciences, Texas A&M University, College Station, TX 77843, USA

<sup>4</sup> Innovation Center for Cell Signaling Network, Xiamen University, Xiamen 361005, China

<sup>5</sup> Department of Electrical and Computer Engineering, Texas A&M University, College Station, TX 77843, USA

<sup>6</sup> Interdisciplinary Program of Genetics, Texas A&M University, College Station, TX 77843, USA

§ These authors contributed equally to this paper

† The current address of this author: College of Electrical and Electronic Engineering, Wenzhou University, Wenzhou 325035, China

\* Corresponding authors:

Guoli Ji - Department of Automation, Xiamen University, Xiamen 361005, China. Email: glji@xmu.edu.cn

James J. Cai - Department of Veterinary Integrative Biosciences, Texas A&M University, College Station, TX 77843, USA. Email: jcai@tamu.edu

## Table of Contents

|                              |    |
|------------------------------|----|
| Supplementary Figures. ....  | 3  |
| Supplementary Figure 1. .... | 3  |
| Supplementary Figure 2. .... | 5  |
| Supplementary Figure 3. .... | 6  |
| Supplementary Figure 4. .... | 7  |
| Supplementary Figure 5. .... | 11 |
| Supplementary Figure 6. .... | 12 |
| Supplementary Tables. ....   | 14 |
| Supplementary Table 1. ....  | 14 |
| Supplementary Table 2. ....  | 16 |
| Supplementary Table 3. ....  | 18 |
| Supplementary Table 4. ....  | 19 |
| Supplementary Table 5. ....  | 20 |

## Supplementary Figures.

**Supplementary Figure 1.** Expression profiles for selected genes with expression variance in SCZ are significantly different from those in CTL (FDR<0.05).

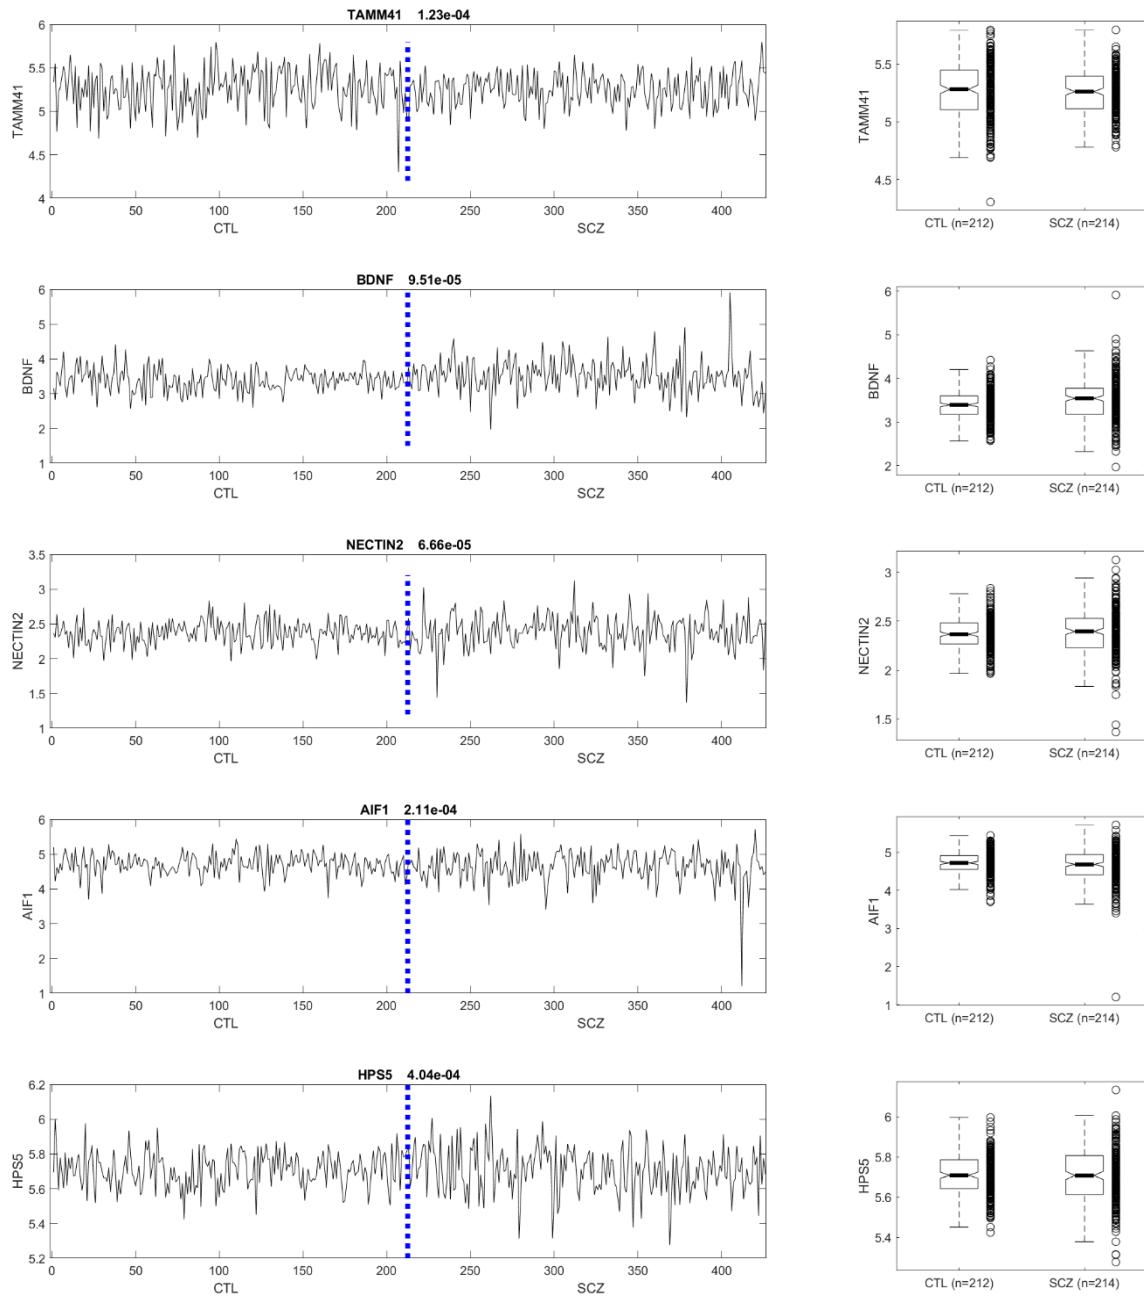

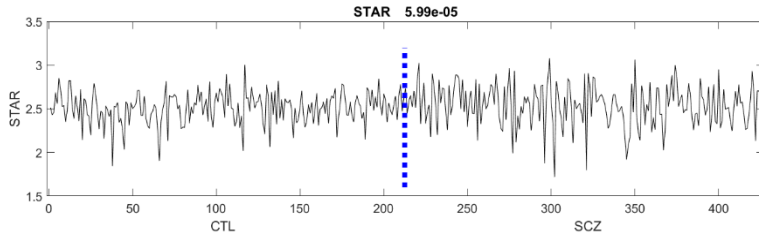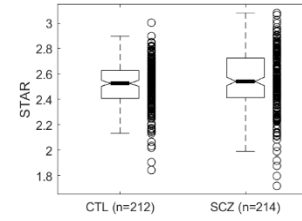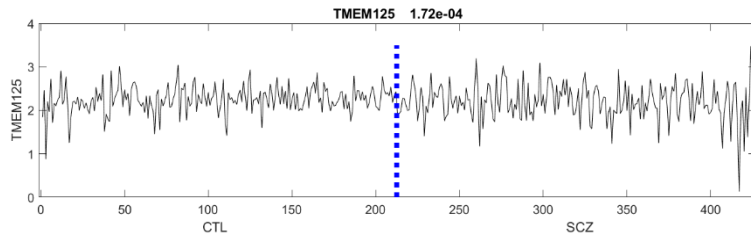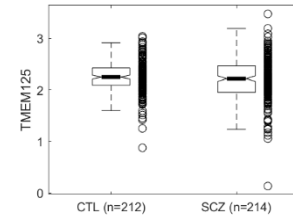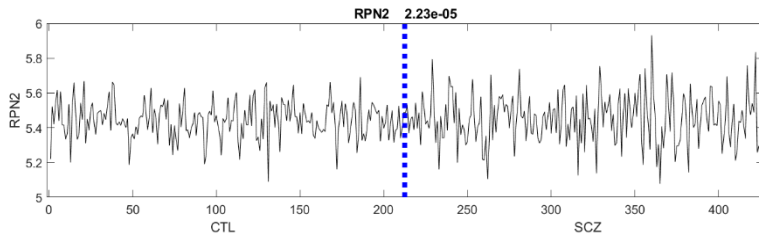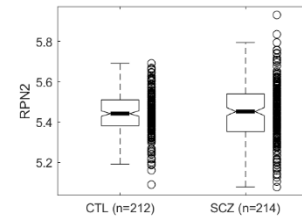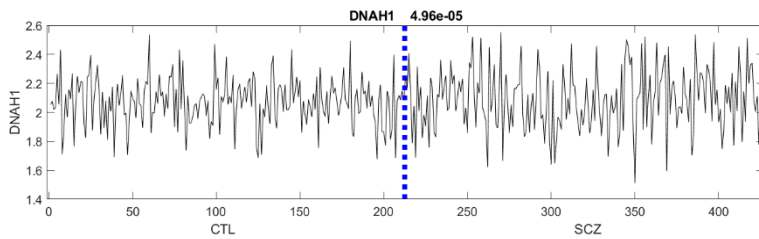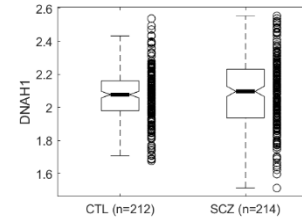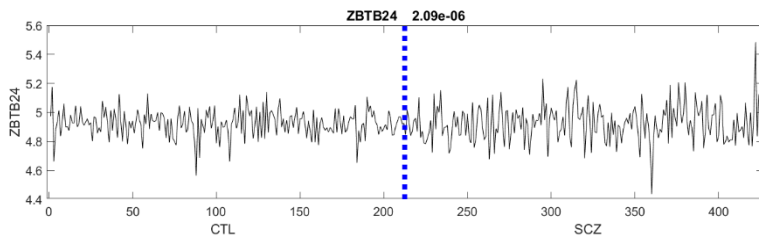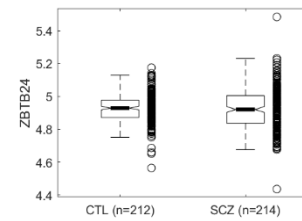

**Supplementary Figure 2.** Removing ‘outlier’ samples in the SCZ group does not cause a substantial change in the significance level of the B–F test. **(a)** Red arrows indicate the two outliers in the original SCZ group that are removed in the secondary analysis. **(b)** The result of secondary analysis showing the significance remains after the two outliers are removed. The overall variance in the SCZ group is significantly greater than that in the CTL group.

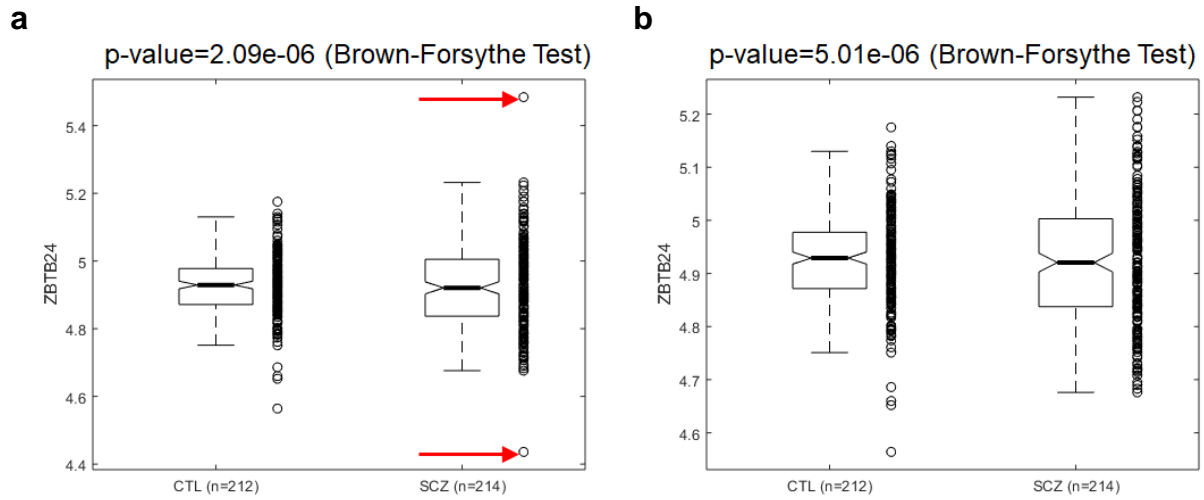

**Supplementary Figure 3.** Tests for equal variances in gene expression between SCZ subjects with and without antipsychotics or antidepressants treatment. **(a)** QQ plot of  $-\log(P_1)$  from real data against  $-\log(P_0)$  from randomly shuffled data.  $P_1$  and  $P_0$  are obtained using the B–F test. For each gene, the B–F test is performed to compare expression variances between SCZ subjects with and without antipsychotics treatment. To build the background distribution of B–F test  $p$ -values, original data (the labels of with and without antipsychotics treatment) is shuffled randomly, following the B–F test for each of genes. **(b)** Same as **(a)** but for antidepressants. **(c)** and **(d)** are the same as **(a)** and **(b)**, respectively, but the test used in **(c)** and **(d)** is Kolmogorov–Smirnov (K–S) test to examine whether gene expression levels in treated and untreated SCZ patients follow the same distribution. All QQ plots show the top 750 genes whose expression variance in SCZ subjects is significantly higher than that in CTL subjects.

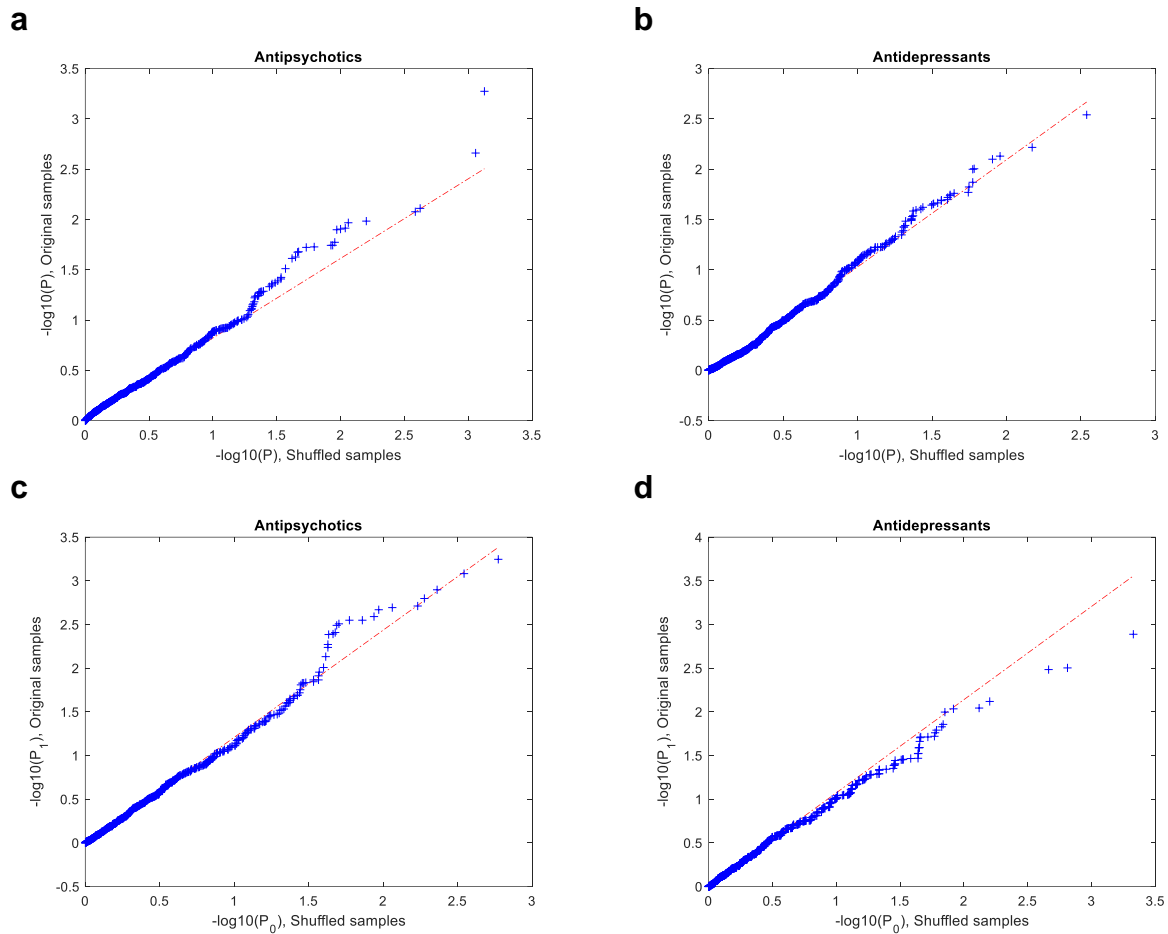

**Supplementary Figure 4.** Effects of the use of antipsychotics and antidepressants on expression variability of *VEGFA* and other selected genes in patients affected with schizophrenia (SCZ). The expression data is obtained from the BrainSeq project, which contains information for 320 control subjects and 175 SCZ patients.

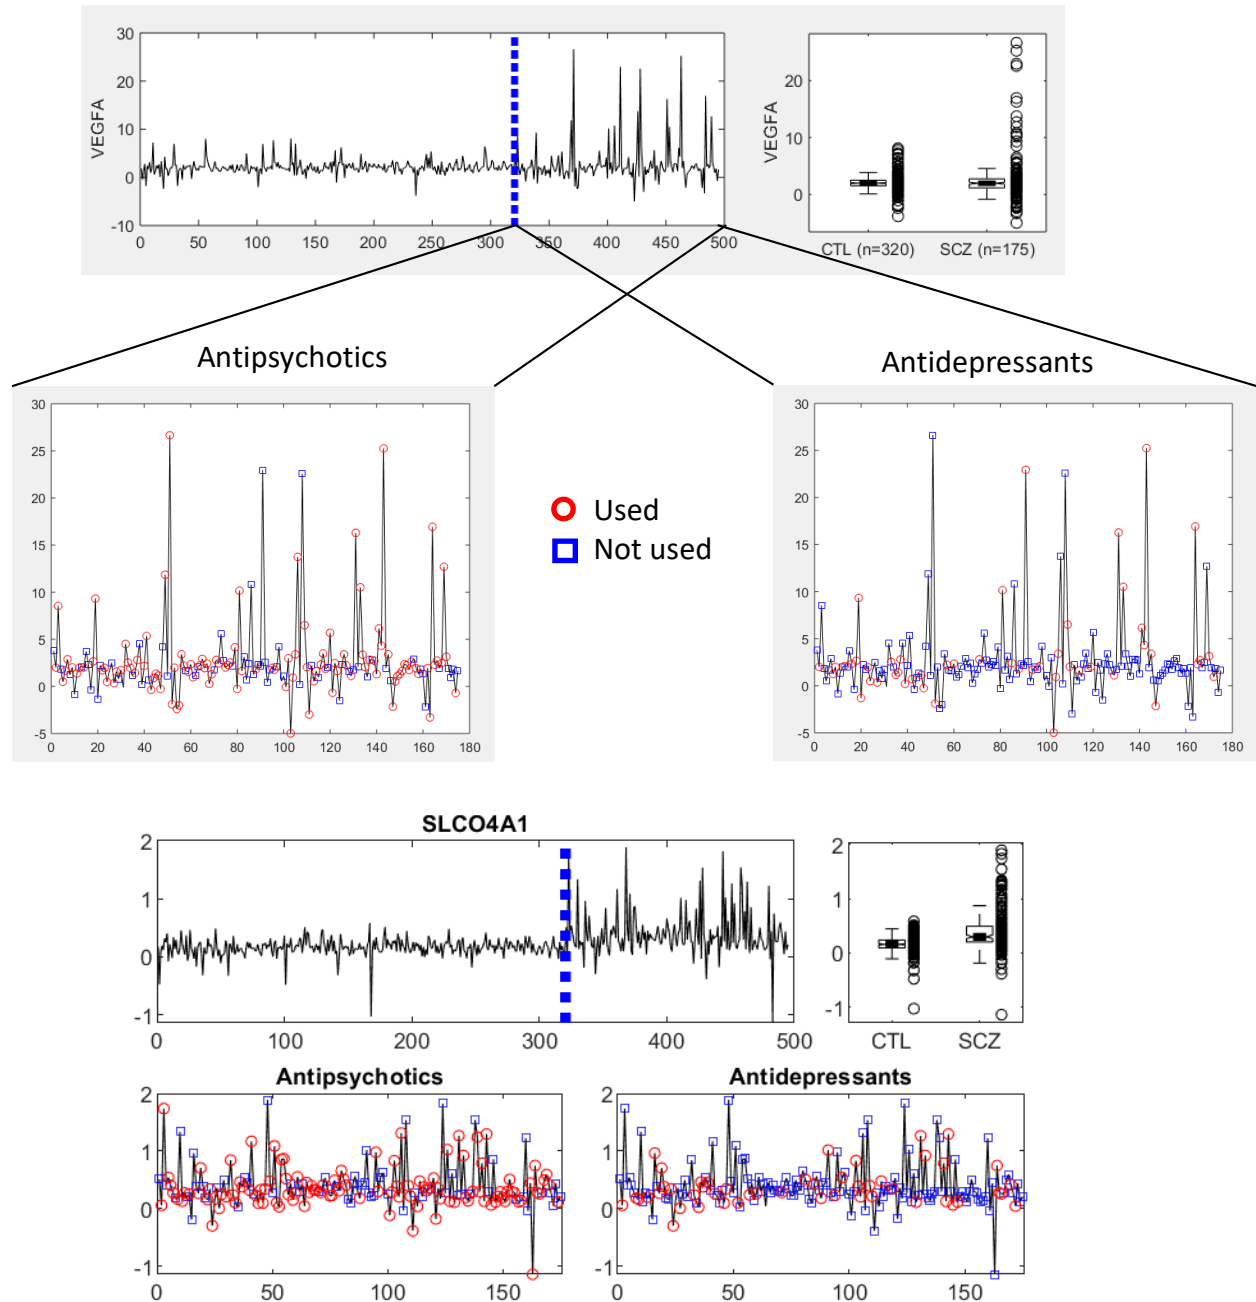

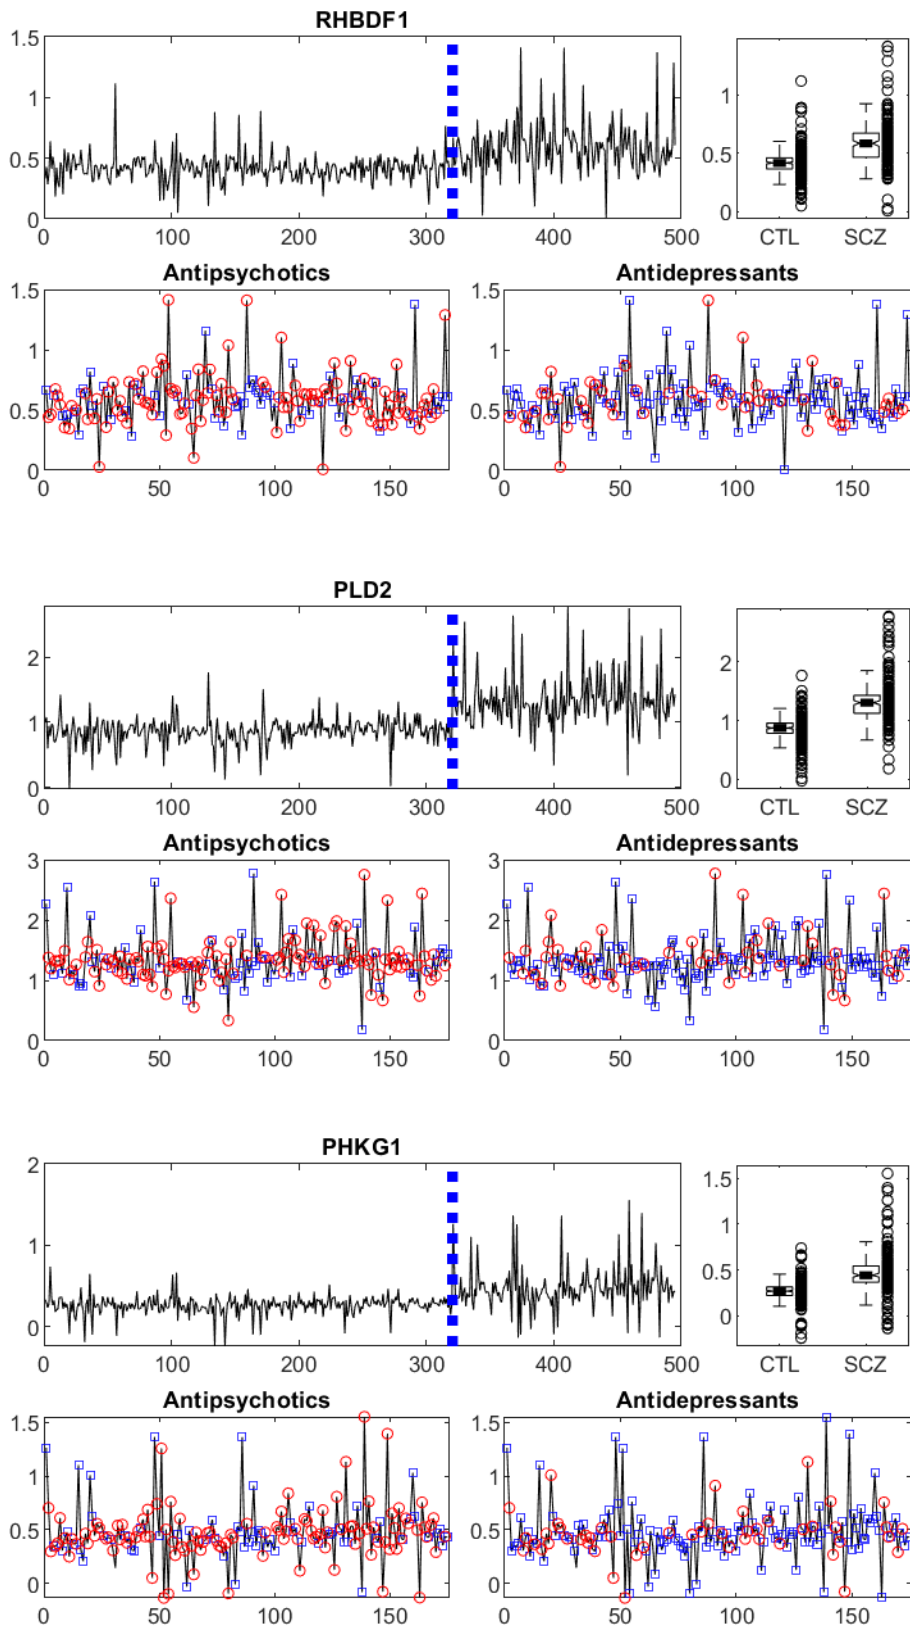



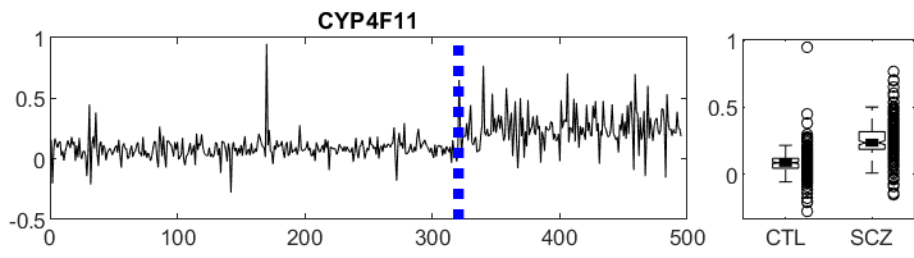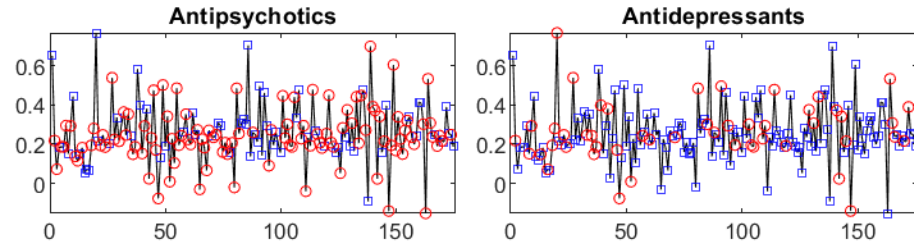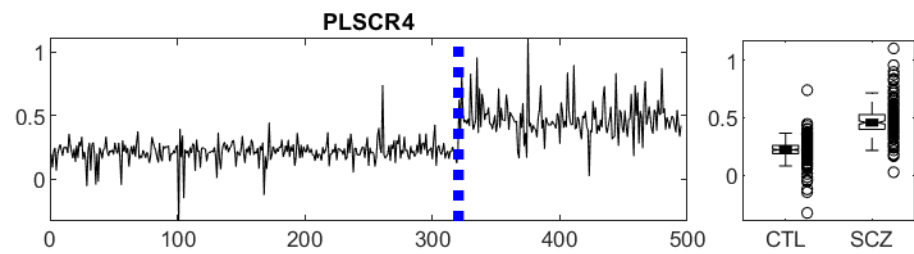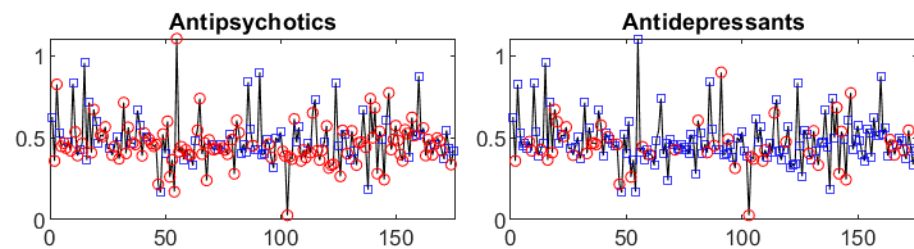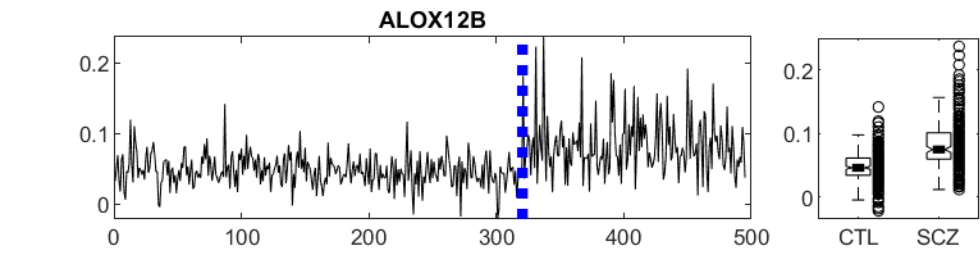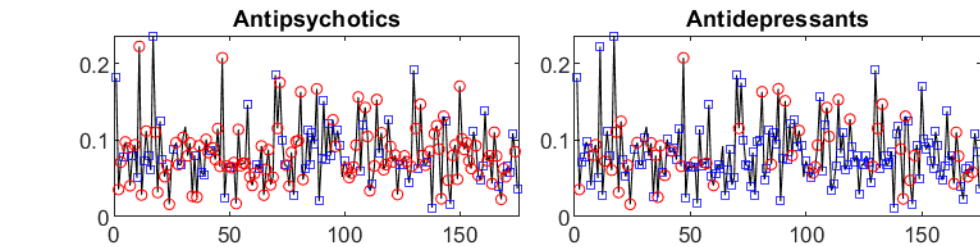

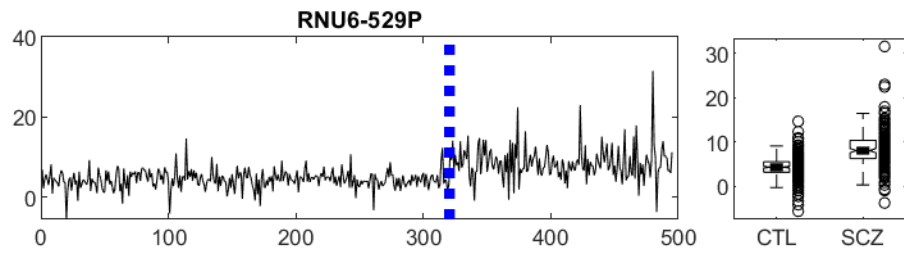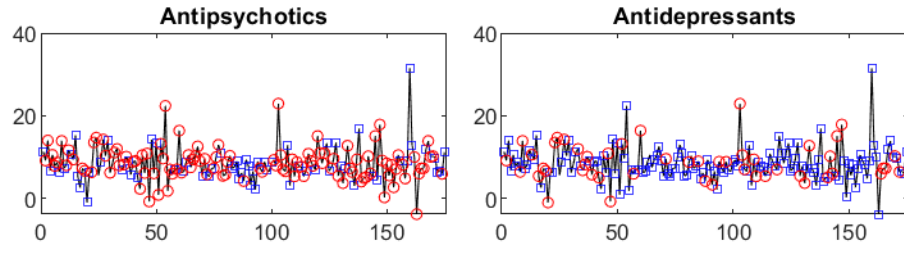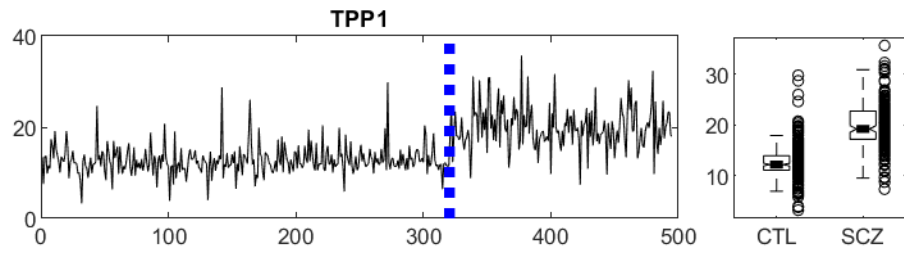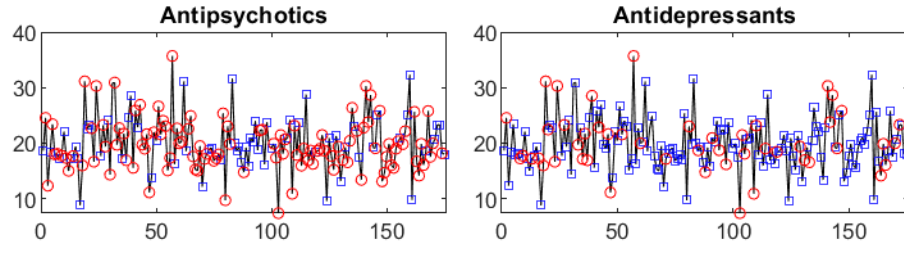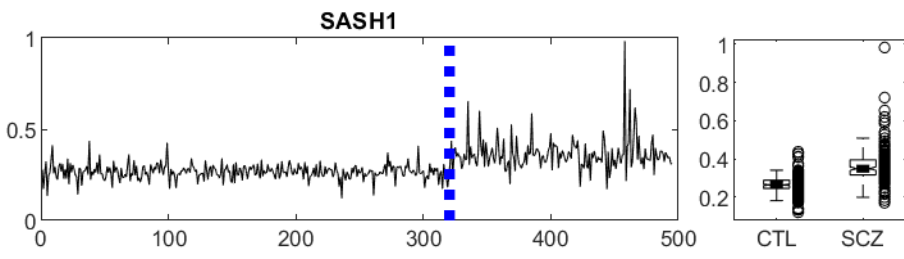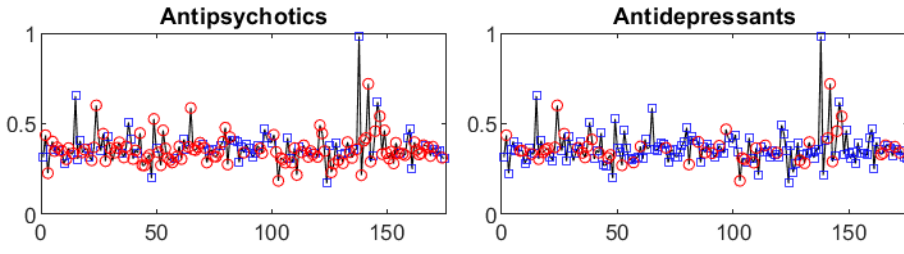

**Supplementary Figure 5.** Statistical power of the MD-based Anderson (2006) test. (a) and our modified version of test (b). The power is estimated using simulated data in the context of detecting significant heterogeneity in multivariate gene expression between two groups. Each contour line depicts the power, i.e., the likelihood level (%) that a random data set would yield a chance finding, as a function of the sample size per group, and alpha—a factor for introducing variance heterogeneity to one of the groups.

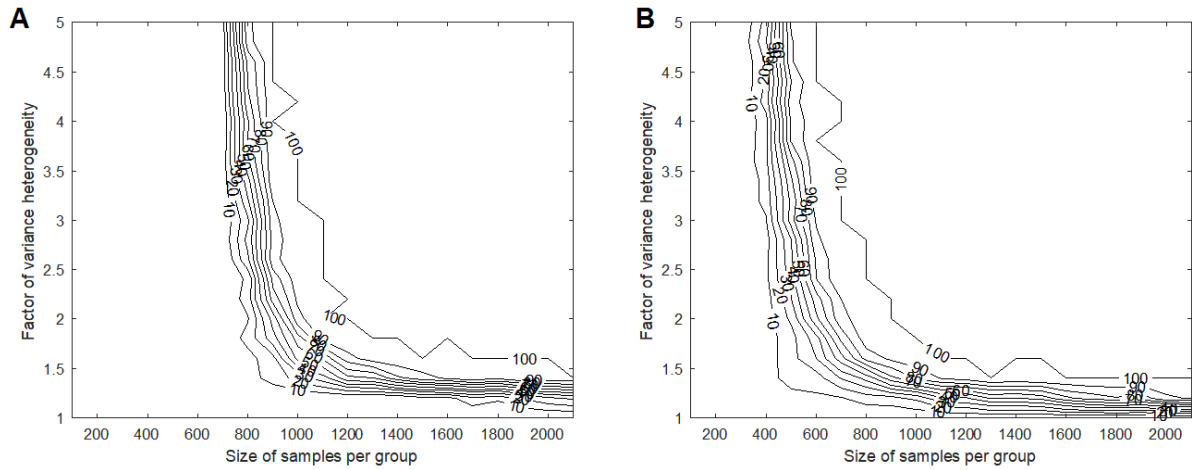

**Supplementary Figure 6.** Additional SCZ-specific evQTL examples.

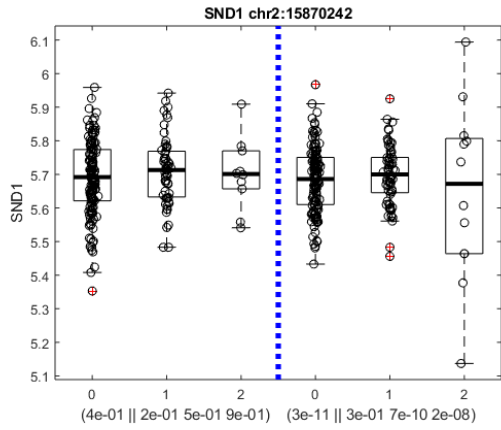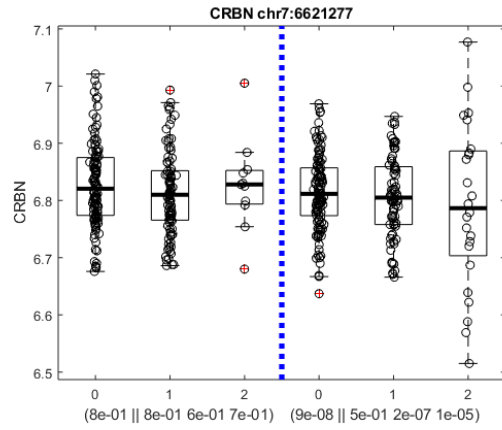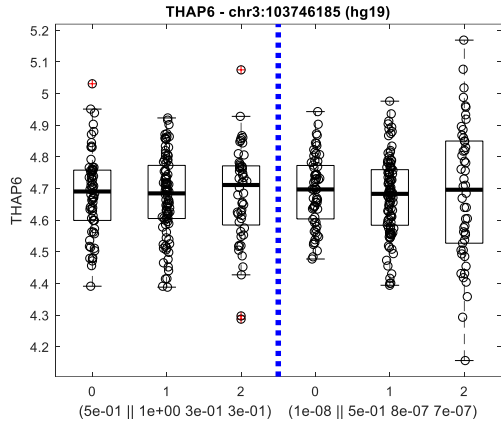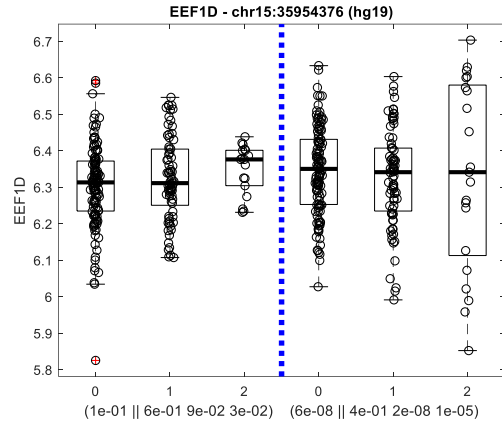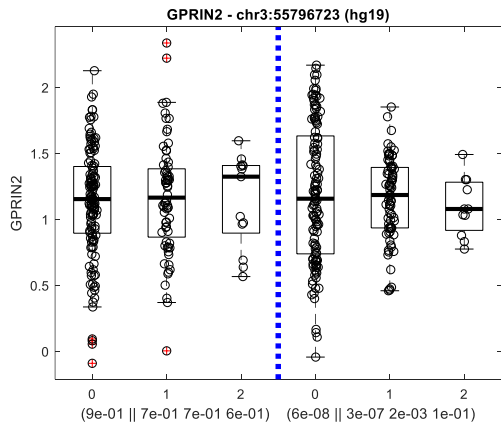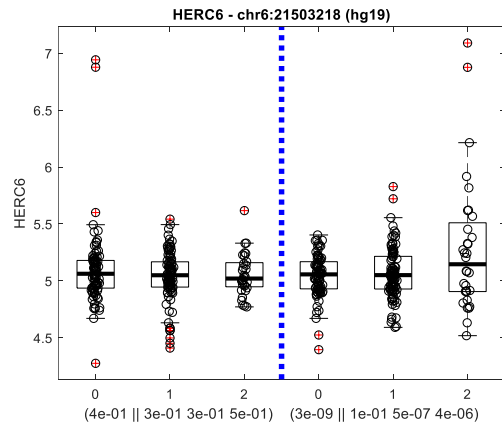

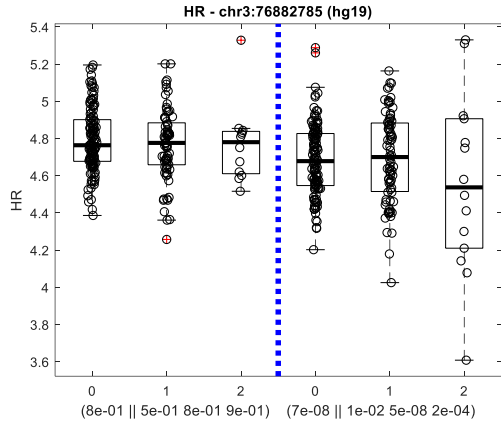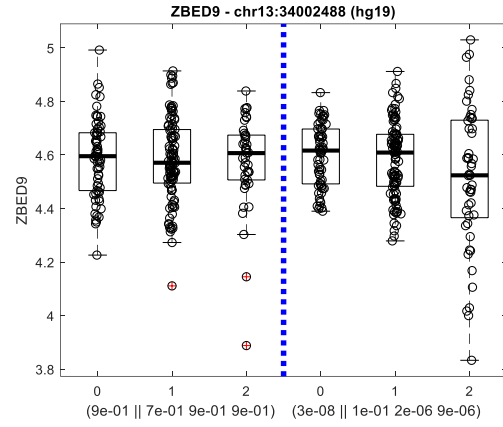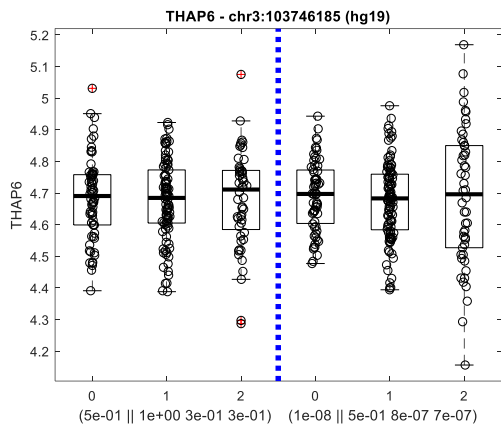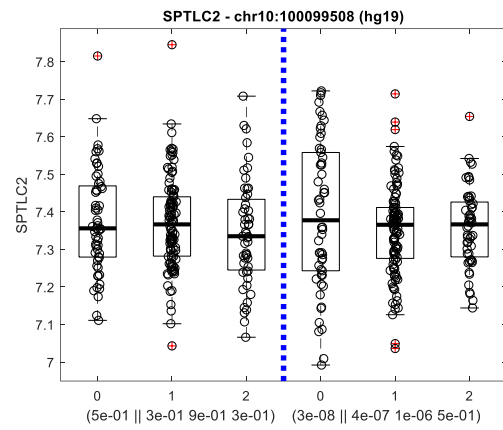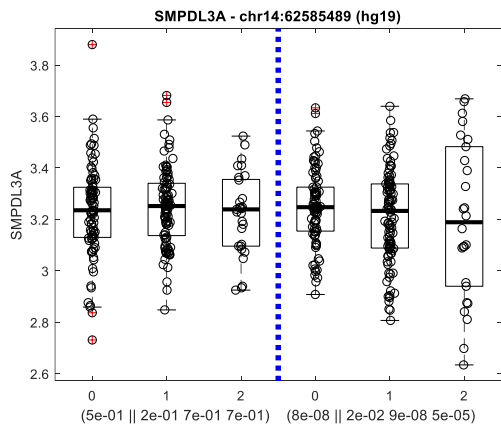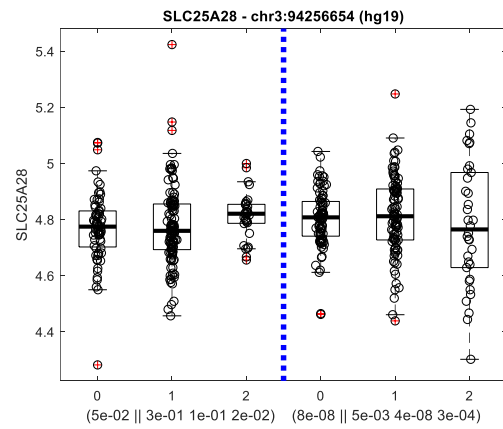

## Supplementary Tables.

**Supplementary Table 1.** List of 88 differentially variable (DV) genes whose expression variance in SCZ is significantly different from that in CTL (FDR<0.05). For each gene, *p*-value of Brown–Forsythe (B-F) test, comparison between expression standard deviation (Std) in SCZ and CTL, and gene name, are given.

| Gene Symbol    | P-value  | Std(SCZ)>Std(CTL)? | HGNC Gene Name                                                  |
|----------------|----------|--------------------|-----------------------------------------------------------------|
| <i>ZBTB24</i>  | 2.09E-06 | Yes                | zinc finger and BTB domain containing 24                        |
| <i>RALY</i>    | 5.07E-06 | Yes                | RALY heterogeneous nuclear ribonucleoprotein                    |
| <i>BICDL1</i>  | 8.52E-06 | Yes                | BICD family like cargo adaptor 1                                |
| <i>AARS</i>    | 1.54E-05 | Yes                | alanyl-tRNA synthetase                                          |
| <i>RPN2</i>    | 2.23E-05 | Yes                | ribophorin II                                                   |
| <i>LCORL</i>   | 2.30E-05 | Yes                | ligand dependent nuclear receptor corepressor like              |
| <i>NPEPL1</i>  | 2.36E-05 | Yes                | aminopeptidase like 1                                           |
| <i>CNP</i>     | 3.33E-05 | Yes                | 2,3-cyclic nucleotide 3 phosphodiesterase                       |
| <i>MAGEF1</i>  | 4.31E-05 | Yes                | MAGE family member F1                                           |
| <i>TOM1</i>    | 4.58E-05 | Yes                | target of myb1 membrane trafficking protein                     |
| <i>LUC7L</i>   | 4.74E-05 | Yes                | LUC7 like                                                       |
| <i>DNAH1</i>   | 4.96E-05 | Yes                | dynein axonemal heavy chain 1                                   |
| <i>RNF125</i>  | 5.38E-05 | Yes                | ring finger protein 125                                         |
| <i>STAR</i>    | 5.99E-05 | Yes                | steroidogenic acute regulatory protein                          |
| <i>EXOC1</i>   | 6.03E-05 | Yes                | exocyst complex component 1                                     |
| <i>NECTIN2</i> | 6.66E-05 | Yes                | nectin cell adhesion molecule 2                                 |
| <i>GALT</i>    | 6.84E-05 | Yes                | galactose-1-phosphate uridylyltransferase                       |
| <i>CCR10</i>   | 7.39E-05 | Yes                | C-C motif chemokine receptor 10                                 |
| <i>BDNF</i>    | 9.51E-05 | Yes                | brain derived neurotrophic factor                               |
| <i>SIRT7</i>   | 9.72E-05 | Yes                | sirtuin 7                                                       |
| <i>PLPP2</i>   | 1.04E-04 | Yes                | phospholipid phosphatase 2                                      |
| <i>NUDT14</i>  | 1.09E-04 | Yes                | nudix hydrolase 14                                              |
| <i>TTC37</i>   | 1.19E-04 | Yes                | tetratricopeptide repeat domain 37                              |
| <i>ZNF33B</i>  | 1.28E-04 | Yes                | zinc finger protein 33B                                         |
| <i>INTS11</i>  | 1.29E-04 | Yes                | integrator complex subunit 11                                   |
| <i>B2M</i>     | 1.43E-04 | Yes                | beta-2-microglobulin                                            |
| <i>HR</i>      | 1.45E-04 | Yes                | HR, lysine demethylase and nuclear receptor corepressor         |
| <i>MARCH9</i>  | 1.46E-04 | Yes                | membrane associated ring-CH-type finger 9                       |
| <i>NQO1</i>    | 1.47E-04 | Yes                | NAD(P)H quinone dehydrogenase 1                                 |
| <i>OPN3</i>    | 1.49E-04 | Yes                | opsin 3                                                         |
| <i>CARS2</i>   | 1.57E-04 | Yes                | cysteinyl-tRNA synthetase 2, mitochondrial                      |
| <i>TMEM125</i> | 1.72E-04 | Yes                | transmembrane protein 125                                       |
| <i>PNPLA8</i>  | 1.84E-04 | Yes                | patatin like phospholipase domain containing 8                  |
| <i>CX3CR1</i>  | 1.96E-04 | Yes                | C-X3-C motif chemokine receptor 1                               |
| <i>ATP5F1C</i> | 2.04E-04 | Yes                | ATP synthase F1 subunit gamma                                   |
| <i>STOML1</i>  | 2.08E-04 | Yes                | stomatin like 1                                                 |
| <i>EIF2D</i>   | 2.09E-04 | Yes                | eukaryotic translation initiation factor 2D                     |
| <i>TDG</i>     | 2.10E-04 | Yes                | thymine DNA glycosylase                                         |
| <i>AIF1</i>    | 2.11E-04 | Yes                | allograft inflammatory factor 1                                 |
| <i>BORCS6</i>  | 2.16E-04 | Yes                | BLOC-1 related complex subunit 6                                |
| <i>ADAMTS9</i> | 2.20E-04 | Yes                | ADAM metallopeptidase with thrombospondin type 1 motif 9        |
| <i>RTN4</i>    | 2.27E-04 | Yes                | reticulon 4                                                     |
| <i>HERPUD2</i> | 2.40E-04 | Yes                | HERPUD family member 2                                          |
| <i>DHPS</i>    | 2.43E-04 | Yes                | deoxyhypusine synthase                                          |
| <i>RPS14</i>   | 2.44E-04 | Yes                | ribosomal protein S14                                           |
| <i>CCNL1</i>   | 2.48E-04 | Yes                | cyclin L1                                                       |
| <i>LAP3</i>    | 2.51E-04 | Yes                | leucine aminopeptidase 3                                        |
| <i>AGPAT2</i>  | 2.57E-04 | Yes                | 1-acylglycerol-3-phosphate O-acyltransferase 2                  |
| <i>RBM11</i>   | 2.59E-04 | Yes                | RNA binding motif protein 11                                    |
| <i>SERP2</i>   | 2.62E-04 | Yes                | stress associated endoplasmic reticulum protein family member 2 |
| <i>CYSLTR2</i> | 2.79E-04 | Yes                | cysteinyl leukotriene receptor 2                                |
| <i>GPRASP2</i> | 2.79E-04 | Yes                | G protein-coupled receptor associated sorting protein 2         |

|                 |          |     |                                                                   |
|-----------------|----------|-----|-------------------------------------------------------------------|
| <i>NLE1</i>     | 2.81E-04 | Yes | notchless homolog 1                                               |
| <i>REXO2</i>    | 2.90E-04 | Yes | RNA exonuclease 2                                                 |
| <i>GLTP</i>     | 3.15E-04 | Yes | glycolipid transfer protein                                       |
| <i>VEGFA</i>    | 3.33E-04 | Yes | vascular endothelial growth factor A                              |
| <i>MAP2K4</i>   | 3.39E-04 | Yes | mitogen-activated protein kinase kinase 4                         |
| <i>PLP1</i>     | 3.50E-04 | Yes | proteolipid protein 1                                             |
| <i>TMEM235</i>  | 3.55E-04 | Yes | transmembrane protein 235                                         |
| <i>KCNJ16</i>   | 3.59E-04 | Yes | potassium voltage-gated channel subfamily J member 16             |
| <i>NEK10</i>    | 3.74E-04 | Yes | NIMA related kinase 10                                            |
| <i>FAM84B</i>   | 3.75E-04 | Yes | family with sequence similarity 84 member B                       |
| <i>C1S</i>      | 3.78E-04 | Yes | complement C1s                                                    |
| <i>JAM2</i>     | 3.90E-04 | Yes | junctional adhesion molecule 2                                    |
| <i>CHGA</i>     | 3.94E-04 | Yes | chromogranin A                                                    |
| <i>CAB39L</i>   | 3.97E-04 | Yes | calcium binding protein 39 like                                   |
| <i>HPS5</i>     | 4.04E-04 | Yes | HPS5, biogenesis of lysosomal organelles complex 2 subunit 2      |
| <i>NCKAP1L</i>  | 4.09E-04 | Yes | NCK associated protein 1 like                                     |
| <i>NQO2</i>     | 4.11E-04 | Yes | N-ribosyl-dihydro-nicotinamide:quinone reductase 2                |
| <i>MRPS17</i>   | 4.19E-04 | Yes | mitochondrial ribosomal protein S17                               |
| <i>C14orf80</i> | 4.23E-04 | Yes | C14orf80                                                          |
| <i>STRN</i>     | 4.35E-04 | Yes | striatin                                                          |
| <i>VWA2</i>     | 4.61E-04 | Yes | von Willebrand factor A domain containing 2                       |
| <i>OLFML3</i>   | 4.65E-04 | Yes | olfactomedin like 3                                               |
| <i>RASGRP3</i>  | 4.86E-04 | Yes | RAS guanyl releasing protein 3                                    |
| <i>TUBGCP6</i>  | 5.08E-04 | Yes | tubulin gamma complex associated protein 6                        |
| <i>CDC27</i>    | 5.35E-04 | Yes | cell division cycle 27                                            |
| <i>CRCP</i>     | 5.42E-04 | Yes | CGRP receptor component                                           |
| <i>CHTF18</i>   | 5.45E-04 | Yes | chromosome transmission fidelity factor 18                        |
| <i>UNC93B1</i>  | 5.54E-04 | Yes | unc-93 homolog B1, TLR signaling regulator                        |
| <i>DIS3</i>     | 5.55E-04 | Yes | DIS3 homolog, exosome endoribonuclease and 3-5 exoribonuclease    |
| <i>GDF7</i>     | 5.57E-04 | Yes | growth differentiation factor 7                                   |
| <i>NDC1</i>     | 5.63E-04 | Yes | NDC1 transmembrane nucleoporin                                    |
| <i>ZFP36L2</i>  | 5.82E-04 | Yes | ZFP36 ring finger protein like 2                                  |
| <i>GNPDA1</i>   | 5.84E-04 | Yes | glucosamine-6-phosphate deaminase 1                               |
| <i>LURAP1</i>   | 5.87E-04 | Yes | leucine rich adaptor protein 1                                    |
| <i>MRPS5</i>    | 6.06E-04 | Yes | mitochondrial ribosomal protein S5                                |
| <i>TAMM41</i>   | 1.23E-04 | No  | TAM41 mitochondrial translocator assembly and maintenance homolog |

**Supplementary Table 2.** List of 110 differentially variable (DV) gene sets whose expression variance in SCZ is higher than that in CTL (P-value < 0.05). For each gene set, the number of genes in the gene set and the number of genes used in the test are given.

| Gene Set Name                                                      | Genes used | Set Size | p-value  |
|--------------------------------------------------------------------|------------|----------|----------|
| GO_PHOSPHATIDYLINOSITOL_3_KINASE_COMPLEX                           | 15         | 20       | 7.47E-05 |
| GO_REGULATION_OF_B_CELL_PROLIFERATION                              | 28         | 55       | 0.000128 |
| GO_CEREBELLAR_CORTEX_MORPHOGENESIS                                 | 23         | 30       | 0.000185 |
| GO_REGULATION_OF_ENDOPLASMIC_RETICULUM_UNFOLDED_PROTEIN_RESPONSE   | 22         | 28       | 0.000248 |
| GO_GENETIC_IMPRINTING                                              | 15         | 20       | 0.000442 |
| GO_POSITIVE_REGULATION_OF_STRIATED_MUSCLE_CELL_DIFFERENTIATION     | 24         | 52       | 0.000544 |
| GO_ENDORIBONUCLEASE_ACTIVITY                                       | 33         | 54       | 0.000557 |
| GO_INSULIN_LIKE_GROWTH_FACTOR_RECEPTOR_SIGNALING_PATHWAY           | 14         | 14       | 0.000787 |
| GO_LIPOPROTEIN_PARTICLE_RECEPTOR_ACTIVITY                          | 12         | 16       | 0.000976 |
| GO_RNA_POLYMERASE_II_ACTIVATING_TRANSCRIPTION_FACTOR_BINDING       | 24         | 36       | 0.000983 |
| GO_FOLIC_ACID_CONTAINING_COMPOUND_METABOLIC_PROCESS                | 22         | 29       | 0.001096 |
| GO_CEREBELLAR_CORTEX_FORMATION                                     | 19         | 22       | 0.00174  |
| GO_NEGATIVE_REGULATION_OF_VASCULATURE_DEVELOPMENT                  | 40         | 80       | 0.001791 |
| GO_RETROGRADE_TRANSPORT_VESICLE_RECYCLING_WITHIN_GOLGI             | 19         | 24       | 0.001965 |
| GO_NEUROMUSCULAR_JUNCTION_DEVELOPMENT                              | 28         | 36       | 0.002129 |
| GO_CEREBELLAR_PURKINJE_CELL_LAYER_DEVELOPMENT                      | 20         | 24       | 0.002393 |
| GO_NEGATIVE_REGULATION_OF_EPITHELIAL_CELL_APOPTOTIC_PROCESS        | 18         | 35       | 0.003546 |
| GO_PYRIMIDINE_DEOXYRIBONUCLEOTIDE_METABOLIC_PROCESS                | 14         | 18       | 0.004017 |
| GO_NEGATIVE_REGULATION_OF_CIRCADIAN_RHYTHM                         | 11         | 17       | 0.004143 |
| GO_NEGATIVE_REGULATION_OF_OXIDOREDUCTASE_ACTIVITY                  | 13         | 26       | 0.004287 |
| GO_ACTIVATING_TRANSCRIPTION_FACTOR_BINDING                         | 40         | 57       | 0.004511 |
| GO_FOUR_WAY_JUNCTION_DNA_BINDING                                   | 13         | 15       | 0.004971 |
| GO_CELL_DIFFERENTIATION_IN_HINDBRAIN                               | 15         | 21       | 0.005239 |
| GO_CEREBELLAR_PURKINJE_CELL_LAYER_MORPHOGENESIS                    | 11         | 14       | 0.005589 |
| GO_ESTABLISHMENT_OF_MITOTIC_SPINDLE_ORIENTATION                    | 16         | 20       | 0.006199 |
| GO_PTERIDINE_CONTAINING_COMPOUND_METABOLIC_PROCESS                 | 28         | 36       | 0.006637 |
| GO_HINDBRAIN_MORPHOGENESIS                                         | 29         | 40       | 0.007094 |
| GO_REGULATION_OF_ASTROCYTE_DIFFERENTIATION                         | 19         | 27       | 0.007418 |
| GO_PHOSPHATIDYLCHOLINE_BIOSYNTHETIC_PROCESS                        | 18         | 27       | 0.008391 |
| GO_REGULATION_OF_GENE_EXPRESSION_BY_GENETIC_IMPRINTING             | 12         | 16       | 0.00853  |
| GO_METALLOEXOPEPTIDASE_ACTIVITY                                    | 26         | 53       | 0.008896 |
| GO_MAMMARY_GLAND_EPITHELIUM_DEVELOPMENT                            | 27         | 53       | 0.009186 |
| GO_LOW_DENSITY_LIPOPROTEIN_RECEPTOR_ACTIVITY                       | 11         | 13       | 0.009581 |
| GO_REGULATION_OF_IRE1_MEDIATED_UNFOLDED_PROTEIN_RESPONSE           | 11         | 13       | 0.009716 |
| GO_AORTA_MORPHOGENESIS                                             | 13         | 22       | 0.010558 |
| GO_PONS_DEVELOPMENT                                                | 9          | 11       | 0.010597 |
| GO_PHOSPHATIDYLSERINE_ACYL_CHAIN_REMODELING                        | 5          | 17       | 0.011621 |
| GO_CYCLIC_NUCLEOTIDE_METABOLIC_PROCESS                             | 36         | 57       | 0.011906 |
| GO_NEGATIVE_REGULATION_OF_NECROTIC_CELL_DEATH                      | 8          | 11       | 0.012233 |
| GO_ALCOHOL_TRANSMEMBRANE_TRANSPORTER_ACTIVITY                      | 11         | 24       | 0.012605 |
| GO_BETA_TUBULIN_BINDING                                            | 34         | 36       | 0.013027 |
| GO_ASYMMETRIC_PROTEIN_LOCALIZATION                                 | 16         | 19       | 0.014989 |
| GO_REGULATION_OF_NECROPTOTIC_PROCESS                               | 8          | 11       | 0.015032 |
| GO_ENTRAINMENT_OF_CIRCADIAN_CLOCK                                  | 20         | 26       | 0.015481 |
| GO_LUNG_ALVEOLUS_DEVELOPMENT                                       | 26         | 41       | 0.015732 |
| GO_REGULATION_OF_MYOBLAST_DIFFERENTIATION                          | 23         | 48       | 0.016142 |
| GO_RESPONSE_TO_MONOAMINE                                           | 30         | 35       | 0.016686 |
| GO_NEURON_PROJECTION_EXTENSION                                     | 42         | 53       | 0.017939 |
| GO_REGULATION_OF_PROTEIN_GLYCOSYLATION                             | 10         | 14       | 0.018605 |
| GO_MISFOLDED_OR_INCOMPLETELY_SYNTHESIZED_PROTEIN_CATABOLIC_PROCESS | 15         | 16       | 0.019102 |
| GO_LIGAND_DEPENDENT_NUCLEAR_RECEPTOR_BINDING                       | 21         | 23       | 0.019312 |
| GO_REGULATION_OF_CELLULAR_SENESCENCE                               | 19         | 26       | 0.019314 |
| GO_RESPONSE_TO_INTERFERON_GAMMA                                    | 67         | 144      | 0.019637 |
| GO_ADENOSINE_DEAMINASE_ACTIVITY                                    | 6          | 11       | 0.01969  |
| GO_RESPONSE_TO_COBALT_ION                                          | 11         | 13       | 0.019726 |
| GO_ANATOMICAL_STRUCTURE_MATURATION                                 | 28         | 39       | 0.020119 |



|                                                                                               |    |     |          |
|-----------------------------------------------------------------------------------------------|----|-----|----------|
| GO_CYSTEINE_TYPE_ENDOPEPTIDASE_INHIBITOR_ACTIVITY_INVOLVED_IN_APOPTOTIC_PROCESS               | 13 | 23  | 0.020416 |
| GO_SPERM_FLAGELLUM                                                                            | 31 | 57  | 0.020598 |
| GO_ICOSANOID_BIOSYNTHETIC_PROCESS                                                             | 20 | 46  | 0.020651 |
| GO_GAMMA_TUBULIN_BINDING                                                                      | 20 | 24  | 0.020713 |
| GO_NEURON_PROJECTION_REGENERATION                                                             | 23 | 33  | 0.020964 |
| GO_REGULATION_OF_HISTONE_H3_K9_METHYLATION                                                    | 11 | 17  | 0.021353 |
| GO_ENDODEOXYRIBONUCLEASE_ACTIVITY_PRODUCING_5_PHOSPHOMONOESTERS                               | 9  | 12  | 0.021898 |
| GO_POSITIVE_REGULATION_OF_INSULIN_SECRETION_INVOLVED_IN_CELLULAR_RESPONSE_TO_GLUCOSE_STIMULUS | 16 | 29  | 0.021975 |
| GO_HOPS_COMPLEX                                                                               | 13 | 14  | 0.022096 |
| GO_RESPONSE_TO_ACIDIC_PH                                                                      | 9  | 21  | 0.022763 |
| GO_CEREBRAL_CORTEX_RADIALY_ORIENTED_CELL_MIGRATION                                            | 24 | 29  | 0.023179 |
| GO_REGULATION_OF_RESPIRATORY_SYSTEM_PROCESS                                                   | 10 | 16  | 0.023361 |
| GO_REGULATION_OF_CARDIAC_MUSCLE_TISSUE_DEVELOPMENT                                            | 27 | 48  | 0.023983 |
| GO_BAF_TYPE_COMPLEX                                                                           | 22 | 23  | 0.024045 |
| GO_NEGATIVE_REGULATION_OF_PHOSPHOPROTEIN_PHOSPHATASE_ACTIVITY                                 | 13 | 15  | 0.025243 |
| GO_NEGATIVE_REGULATION_OF_VIRAL_RELEASE_FROM_HOST_CELL                                        | 12 | 16  | 0.025808 |
| GO_THYROID_HORMONE_RECEPTOR_BINDING                                                           | 25 | 30  | 0.026377 |
| GO_REGULATION_OF_STEM_CELL_POPULATION_MAINTENANCE                                             | 10 | 17  | 0.027781 |
| GO_PEPTIDYL_CYSTEINE_MODIFICATION                                                             | 17 | 20  | 0.027821 |
| GO_DEATH_RECEPTOR_ACTIVITY                                                                    | 10 | 24  | 0.028411 |
| GO_REGULATION_OF_ORGANIC_ACID_TRANSPORT                                                       | 32 | 50  | 0.028846 |
| GO_NEGATIVE_REGULATION_OF_ERAD_PATHWAY                                                        | 11 | 12  | 0.029155 |
| GO_INTRONIC_TRANSCRIPTION_REGULATORY_REGION_DNA_BINDING                                       | 8  | 12  | 0.029386 |
| GO_REGULATION_OF_INSULIN_RECEPTOR_SIGNALING_PATHWAY                                           | 30 | 43  | 0.030568 |
| GO_NEGATIVE_REGULATION_OF_GLIAL_CELL_DIFFERENTIATION                                          | 16 | 26  | 0.030843 |
| GO_TRANSFERASE_ACTIVITY_TRANSFERRING_NITROGENOUS_GROUPS                                       | 14 | 23  | 0.030988 |
| GO_ARTERY_MORPHOGENESIS                                                                       | 26 | 51  | 0.031398 |
| GO_ENTEROENDOCRINE_CELL_DIFFERENTIATION                                                       | 9  | 19  | 0.03298  |
| GO_ESTABLISHMENT_OF_MITOTIC_SPINDLE_LOCALIZATION                                              | 19 | 24  | 0.034051 |
| GO_AP_TYPE_MEMBRANE_COAT_ADAPTOR_COMPLEX                                                      | 34 | 40  | 0.03454  |
| GO_ACTIVATION_OF_JUN_KINASE_ACTIVITY                                                          | 23 | 35  | 0.034652 |
| GO_ACYL_COA_BIOSYNTHETIC_PROCESS                                                              | 41 | 54  | 0.034656 |
| GO_REGULATION_OF_ESTABLISHMENT_OF_ENDOTHELIAL_BARRIER                                         | 5  | 12  | 0.035186 |
| GO_POSITIVE_REGULATION_OF_CELL_JUNCTION_ASSEMBLY                                              | 17 | 24  | 0.03531  |
| GO_NEGATIVE_REGULATION_OF_CELLULAR_RESPONSE_TO_TRANSFORMING_GROWTH_FACTOR_BETA_STIMULUS       | 44 | 66  | 0.036344 |
| GO_CARBOXYPEPTIDASE_ACTIVITY                                                                  | 17 | 41  | 0.036497 |
| GO_REGULATION_OF_OSTEOBLAST_PROLIFERATION                                                     | 17 | 23  | 0.037838 |
| GO_PROLINE_RICH_REGION_BINDING                                                                | 17 | 19  | 0.039542 |
| GO_SEGMENTATION                                                                               | 51 | 89  | 0.040282 |
| GO_PROTEIN_LOCALIZATION_TO_CYTOSKELETON                                                       | 25 | 30  | 0.040566 |
| GO_BRANCHING_INVOLVED_IN_MAMMARY_GLAND_DUCT_MORPHOGENESIS                                     | 10 | 20  | 0.040843 |
| GO_REGULATION_OF_BLOOD_PRESSURE                                                               | 68 | 169 | 0.040843 |
| GO_POSITIVE_REGULATION_OF_MYOTUBE_DIFFERENTIATION                                             | 10 | 29  | 0.043661 |
| GO_PROTEIN_DEALKYLATION                                                                       | 24 | 29  | 0.043856 |
| GO_SOMITE_DEVELOPMENT                                                                         | 44 | 78  | 0.044243 |
| GO_CORONARY_VASCULATURE_DEVELOPMENT                                                           | 27 | 37  | 0.044453 |
| GO_PEPTIDE_CATABOLIC_PROCESS                                                                  | 16 | 25  | 0.044801 |
| GO_CELLULAR_PIGMENT_ACCUMULATION                                                              | 7  | 12  | 0.045288 |
| GO_CELLULAR_RESPONSE_TO_REACTIVE_NITROGEN_SPECIES                                             | 14 | 19  | 0.045555 |
| GO_NEGATIVE_REGULATION_OF_STRIATED_MUSCLE_CELL_APOPTOTIC_PROCESS                              | 11 | 17  | 0.045941 |
| GO_NPBAF_COMPLEX                                                                              | 12 | 12  | 0.046628 |
| GO_REGULATION_OF_TELOMERE_CAPPING                                                             | 17 | 22  | 0.04801  |
| GO_REGULATION_OF_CARDIAC_MUSCLE_CELL_PROLIFERATION                                            | 17 | 29  | 0.048426 |
| GO_NEGATIVE_REGULATION_OF_CARTILAGE_DEVELOPMENT                                               | 10 | 26  | 0.04971  |

**Supplementary Table 3.** List of 9 differentially variable (DV) gene sets whose expression variance in SCZ is smaller than that in CTL (P-value < 0.05). For each gene set, the number of genes in the gene set and the number of genes used in the test are given.

| Gene Set Name                                      | Genes used | Set Size | P-value  |
|----------------------------------------------------|------------|----------|----------|
| GO_NEUREXIN_FAMILY_PROTEIN_BINDING                 | 10         | 14       | 0.000303 |
| GO_PROTEASOME_ACCESSORY_COMPLEX                    | 23         | 24       | 0.003865 |
| GO_PLATELET_DERIVED_GROWTH_FACTOR_RECEPTOR_BINDING | 10         | 15       | 0.018709 |
| GO_SMN_SM_PROTEIN_COMPLEX                          | 13         | 17       | 0.018976 |
| GO_RESPONSE_TO_VITAMIN_D                           | 15         | 33       | 0.021413 |
| GO_ENDODERMAL_CELL_FATE_COMMITMENT                 | 7          | 13       | 0.022717 |
| GO_NEURON_CELL_CELL_ADHESION                       | 15         | 16       | 0.023955 |
| GO_CELLULAR_RESPONSE_TO_VITAMIN                    | 12         | 26       | 0.038477 |
| GO_PHOSPHATE_ION_BINDING                           | 5          | 11       | 0.046763 |

**Supplementary Table 4.** List of evQTLs.

The table is available for downloading at: [https://github.com/cailab-tamu/SCZ\\_GE\\_Dispersion/blob/master/s4\\_scz\\_vqtl\\_detection/Suppl\\_table\\_S4.xlsx](https://github.com/cailab-tamu/SCZ_GE_Dispersion/blob/master/s4_scz_vqtl_detection/Suppl_table_S4.xlsx)

**Supplementary Table 5.** Information of donors of the CommonMind project.

| Individual ID | Institution | CTL or SCZ | Gender | Ethnicity | Brain Weight (g) | PMI (hrs) | pH   | Year of Autops (y) | Age of Death | Height (in) | Weight (lbs) |
|---------------|-------------|------------|--------|-----------|------------------|-----------|------|--------------------|--------------|-------------|--------------|
| CMC_MSSM_029  | MSSM        | Control    | Female | Caucasian | 1005             | 5.7       | 6.1  | 1995               | 82           | 67.00003618 | 180          |
| CMC_MSSM_035  | MSSM        | Control    | Male   | Caucasian | 1102             | 2         | 6.6  | 1994               | 75           | NA          | 118          |
| CMC_MSSM_036  | MSSM        | Control    | Female | Caucasian | 1010             | 3.8       | 6.4  | 1995               | 82           | NA          | 121          |
| CMC_MSSM_039  | MSSM        | Control    | Female | Caucasian | 1174             | 24        | 6.3  | 2004               | 68           | 69.00003726 | 275          |
| CMC_MSSM_040  | MSSM        | Control    | Male   | Caucasian | 1376             | 23.8      | 6.69 | 2005               | 64           | NA          | 214          |
| CMC_MSSM_041  | MSSM        | Control    | Female | Caucasian | 940              | 3.4       | 6.1  | 1986               | 90           | NA          | NA           |
| CMC_MSSM_044  | MSSM        | Control    | Male   | Caucasian | 1402             | 7.6       | 6.58 | 2000               | 66           | 69.00003726 | 237          |
| CMC_MSSM_045  | MSSM        | Control    | Male   | Caucasian | 1345             | 21.1      | 6.94 | 2005               | 73           | 68.00003672 | 192          |
| CMC_MSSM_046  | MSSM        | Control    | Female | Caucasian | 876              | 1.8       | 6.49 | 2003               | 90           | 61.00003294 | 112          |
| CMC_MSSM_047  | MSSM        | Control    | Female | Caucasian | 1199             | 14.9      | 6.82 | 2007               | 60           | 69.00003726 | 190          |
| CMC_MSSM_049  | MSSM        | Control    | Female | Caucasian | 1222             | 20.3      | NA   | 2007               | 61           | 64.00003456 | 114          |
| CMC_MSSM_052  | MSSM        | Control    | Female | Caucasian | 1040             | 8         | 7.27 | 2006               | 85           | 60.0000324  | 109          |
| CMC_MSSM_053  | MSSM        | Control    | Male   | Caucasian | 1278             | 10.4      | 6.12 | 2006               | 64           | 73.00003942 | 251          |
| CMC_MSSM_054  | MSSM        | Control    | Male   | Caucasian | 1164             | 11.4      | 6.83 | 2005               | 84           | 69.00003726 | 135          |
| CMC_MSSM_055  | MSSM        | Control    | Male   | Caucasian | 1370             | 23.9      | 6.93 | 2005               | 66           | 72.00003888 | 167          |
| CMC_MSSM_056  | MSSM        | Control    | Female | Caucasian | 1222             | 16.5      | 6.67 | 2005               | 67           | 65.0000351  | 283          |
| CMC_MSSM_061  | MSSM        | Control    | Male   | Caucasian | 1044             | 2.8       | 6.55 | 2005               | 68           | 64.00003456 | 112          |
| CMC_MSSM_064  | MSSM        | Control    | Male   | Caucasian | 1196             | 5.3       | 6.9  | 2003               | 85           | 67.00003618 | 158          |
| CMC_MSSM_065  | MSSM        | Control    | Female | Caucasian | 984              | 5.9       | 6.58 | 2003               | 90           | 48.00002592 | 148          |
| CMC_MSSM_066  | MSSM        | Control    | Female | Caucasian | 998              | 4.3       | 6.48 | 2003               | 78           | 62.00003348 | 126.6        |
| CMC_MSSM_072  | MSSM        | Control    | Female | Caucasian | 1355             | 22.6      | 6.85 | 2004               | 66           | 68.00003672 | NA           |
| CMC_MSSM_073  | MSSM        | Control    | Female | Caucasian | 979              | 8.6       | 6.5  | 1988               | 79           | NA          | NA           |
| CMC_MSSM_074  | MSSM        | Control    | Female | Caucasian | 1006             | 4.7       | 6.5  | 1988               | 86           | NA          | NA           |
| CMC_MSSM_075  | MSSM        | Control    | Female | Caucasian | 1398             | 3.8       | 6.7  | 1991               | 77           | NA          | NA           |
| CMC_MSSM_078  | MSSM        | Control    | Male   | Caucasian | 1266             | 6.1       | NA   | 2009               | 90           | 63.00003402 | 164.9        |
| CMC_MSSM_079  | MSSM        | Control    | Female | Caucasian | 1235             | 5.8       | NA   | 2010               | 90           | 62.00003348 | 162          |
| CMC_MSSM_080  | MSSM        | Control    | Male   | Caucasian | 1211             | 4.1       | 6.16 | 1997               | 84           | NA          | 154          |
| CMC_MSSM_081  | MSSM        | Control    | Female | Caucasian | 1022             | 5.1       | 6.4  | 1992               | 88           | NA          | NA           |
| CMC_MSSM_084  | MSSM        | Control    | Male   | Caucasian | 1388             | 19.5      | 6.59 | 2007               | 31           | 63.00003402 | 120          |
| CMC_MSSM_085  | MSSM        | Control    | Male   | Caucasian | 1238             | 19.2      | 6.14 | 2006               | 74           | 72.00003888 | 123          |
| CMC_MSSM_089  | MSSM        | Control    | Male   | Caucasian | 1104             | 3.5       | NA   | 2008               | 90           | 71.00003834 | 150          |
| CMC_MSSM_090  | MSSM        | Control    | Male   | Caucasian | 1422             | 23.8      | 6.04 | 2006               | 70           | NA          | 146.1        |
| CMC_MSSM_092  | MSSM        | Control    | Female | Caucasian | 1049             | 6.8       | 6.6  | 2001               | 79           | 69.00003726 | 143          |
| CMC_MSSM_093  | MSSM        | Control    | Female | Caucasian | 894              | 2         | NA   | 2009               | 90           | NA          | 173.8        |
| CMC_MSSM_094  | MSSM        | Control    | Female | Caucasian | 1144             | 5         | 6.73 | 2005               | 90           | 63.00003402 | 135.2        |
| CMC_MSSM_096  | MSSM        | Control    | Female | Caucasian | 1179             | 4.6       | 6.3  | 1988               | 67           | NA          | NA           |
| CMC_MSSM_100  | MSSM        | Control    | Male   | Caucasian | 1238             | 23.3      | 6.68 | 2006               | 64           | 70.0000378  | 96           |
| CMC_MSSM_101  | MSSM        | Control    | Female | Caucasian | 1274             | 9         | NA   | 2007               | 88           | 63.00003402 | 137          |
| CMC_MSSM_105  | MSSM        | Control    | Female | Caucasian | 1128             | 5.1       | NA   | 2010               | 90           | 64.00003456 | 160          |
| CMC_MSSM_106  | MSSM        | Control    | Female | Caucasian | 1094             | 11.1      | NA   | 2012               | 90           | 60.0000324  | 170.8        |
| CMC_MSSM_107  | MSSM        | Control    | Female | Caucasian | 974              | 14.8      | NA   | 2012               | 90           | NA          | NA           |
| CMC_MSSM_108  | MSSM        | Control    | Male   | Caucasian | 1120             | 11.8      | NA   | 2012               | 90           | 70.0000378  | 140          |
| CMC_MSSM_109  | MSSM        | Control    | Female | Caucasian | 1136             | 7.6       | NA   | 2011               | 90           | 68.00003672 | 110          |
| CMC_MSSM_110  | MSSM        | Control    | Female | Caucasian | 1210             | 4.8       | 6.4  | 1992               | 89           | NA          | NA           |
| CMC_MSSM_117  | MSSM        | Control    | Male   | Caucasian | 1170             | 6.6       | NA   | 2008               | 86           | 67.00003618 | 116          |
| CMC_MSSM_121  | MSSM        | Control    | Male   | Caucasian | 1488             | 13.8      | 7    | 2006               | 51           | 71.00003834 | 190          |
| CMC_MSSM_122  | MSSM        | Control    | Male   | Caucasian | 1184             | 10.2      | 6.37 | 2006               | 90           | NA          | 154          |
| CMC_MSSM_124  | MSSM        | Control    | Male   | Caucasian | 1386             | 16.8      | 6.55 | 2006               | 48           | 76.00004104 | 290          |
| CMC_MSSM_130  | MSSM        | Control    | Male   | Caucasian | 1464             | 10.7      | 6.78 | 2007               | 41           | 73.00003942 | 240          |
| CMC_MSSM_136  | MSSM        | Control    | Male   | Caucasian | 1164             | 2.9       | 6.32 | 2002               | 76           | 69.00003726 | 121.8        |
| CMC_MSSM_137  | MSSM        | Control    | Female | Caucasian | 989              | 1.4       | 6.6  | 1993               | 90           | NA          | 92           |
| CMC_MSSM_140  | MSSM        | Control    | Female | Caucasian | 1128             | 5         | NA   | 2009               | 85           | 63.00003402 | 163          |
| CMC_MSSM_150  | MSSM        | Control    | Female | Caucasian | 1024             | 6.8       | 6.5  | 1988               | 90           | NA          | NA           |
| CMC_MSSM_151  | MSSM        | Control    | Male   | Caucasian | 1022             | 2.7       | 6    | 1989               | 89           | NA          | NA           |
| CMC_MSSM_159  | MSSM        | Control    | Female | Caucasian | 1020             | 4.5       | 6.3  | 1999               | 90           | NA          | 101          |
| CMC_MSSM_160  | MSSM        | Control    | Female | Caucasian | 984              | 2.3       | 6.5  | 1991               | 80           | NA          | NA           |
| CMC_MSSM_173  | MSSM        | Control    | Male   | Caucasian | 1528             | 17.5      | 6.83 | 2006               | 53           | 71.00003834 | 200          |
| CMC_MSSM_174  | MSSM        | Control    | Male   | Caucasian | 1130             | 13        | NA   | 2007               | 79           | 70.0000378  | 156          |
| CMC_MSSM_175  | MSSM        | Control    | Male   | Caucasian | 1286             | 8.7       | 6.6  | 1994               | 79           | NA          | NA           |

|              |      |         |        |           |      |      |      |      |    |             |       |
|--------------|------|---------|--------|-----------|------|------|------|------|----|-------------|-------|
| CMC_MSSM_177 | MSSM | Control | Male   | Caucasian | 1448 | 20.2 | NA   | 2007 | 60 | 67.00003618 | 195   |
| CMC_MSSM_178 | MSSM | Control | Male   | Caucasian | 1222 | 21   | NA   | 2007 | 60 | 69.00003726 | 173   |
| CMC_MSSM_179 | MSSM | Control | Female | Caucasian | 1004 | 11.5 | NA   | 2008 | 86 | 63.00003402 | 154   |
| CMC_MSSM_182 | MSSM | Control | Male   | Caucasian | 1504 | 23.7 | NA   | 2007 | 62 | 67.00003618 | 188   |
| CMC_MSSM_183 | MSSM | Control | Male   | Caucasian | 1168 | 10.8 | NA   | 2007 | 66 | 71.00003834 | 130   |
| CMC_MSSM_184 | MSSM | Control | Female | Caucasian | 1064 | 7.3  | NA   | 2008 | 90 | 64.00003456 | 120   |
| CMC_MSSM_185 | MSSM | Control | Male   | Caucasian | 1247 | 11.7 | 6.5  | 1995 | 81 | NA          | 133.2 |
| CMC_MSSM_187 | MSSM | Control | Male   | Caucasian | 1380 | 20.6 | 6.54 | 2005 | 39 | 71.00003834 | 175   |
| CMC_MSSM_190 | MSSM | Control | Male   | Caucasian | 1446 | 20.9 | 6.62 | 2005 | 84 | 71.00003834 | 175   |
| CMC_MSSM_203 | MSSM | Control | Male   | Caucasian | 1420 | 18   | 6.88 | 1996 | 70 | NA          | NA    |
| CMC_MSSM_208 | MSSM | Control | Female | Caucasian | 809  | 2.7  | 6    | 1993 | 90 | NA          | 84    |
| CMC_MSSM_215 | MSSM | Control | Male   | Caucasian | 941  | 9.6  | 6.5  | 1996 | 84 | NA          | 100   |
| CMC_MSSM_217 | MSSM | Control | Female | Caucasian | 1202 | 35.2 | 6.4  | 1995 | 79 | NA          | 97    |
| CMC_MSSM_219 | MSSM | Control | Female | Caucasian | 1289 | 20.4 | 6.2  | 1995 | 86 | NA          | 98    |
| CMC_MSSM_225 | MSSM | Control | Female | Caucasian | 1099 | 3.3  | 6.7  | 1991 | 90 | NA          | NA    |
| CMC_MSSM_226 | MSSM | Control | Female | Caucasian | 962  | 3.8  | 6.6  | 1994 | 90 | NA          | 74    |
| CMC_MSSM_227 | MSSM | Control | Male   | Caucasian | 1356 | 13   | 6.38 | 2005 | 27 | 67.00003618 | 172   |
| CMC_MSSM_228 | MSSM | Control | Male   | Caucasian | 1472 | 20   | 6.66 | 2005 | 43 | 71.00003834 | 190   |
| CMC_MSSM_230 | MSSM | Control | Male   | Caucasian | 1364 | 23.5 | 6.69 | 2004 | 38 | 71.00003834 | 170   |
| CMC_MSSM_232 | MSSM | Control | Male   | Caucasian | 1300 | 20   | 6.88 | 2004 | 24 | NA          | NA    |
| CMC_MSSM_233 | MSSM | Control | Male   | Caucasian | 1436 | 14.2 | 6.92 | 2004 | 49 | 68.00003672 | 229   |
| CMC_MSSM_234 | MSSM | Control | Male   | Caucasian | 1072 | 2.8  | 6.3  | 1994 | 90 | NA          | 154   |
| CMC_MSSM_235 | MSSM | Control | Male   | Caucasian | 1450 | 22.5 | 6.26 | 2004 | 56 | 71.00003834 | 300   |
| CMC_MSSM_237 | MSSM | Control | Male   | Caucasian | 1272 | 18.8 | 6.56 | 2005 | 42 | NA          | NA    |
| CMC_MSSM_238 | MSSM | Control | Female | Caucasian | 1094 | 9.5  | 6.21 | 2005 | 81 | 64.00003456 | 106.8 |
| CMC_MSSM_242 | MSSM | Control | Male   | Caucasian | 1410 | 21.7 | 7.09 | 2005 | 71 | 70.0000378  | 200   |
| CMC_MSSM_244 | MSSM | Control | Female | Caucasian | 1286 | 19.3 | 6.33 | 2004 | 41 | 65.0000351  | 142   |
| CMC_MSSM_247 | MSSM | Control | Male   | Caucasian | 1368 | 28.8 | 6.76 | 2002 | 60 | 70.0000378  | 299   |
| CMC_MSSM_249 | MSSM | Control | Male   | Caucasian | 1135 | 2.9  | 6.65 | 1999 | 84 | 68.00003672 | 127   |
| CMC_MSSM_251 | MSSM | Control | Male   | Caucasian | 912  | 18.8 | 6.59 | 1989 | 61 | NA          | NA    |
| CMC_MSSM_252 | MSSM | Control | Female | Caucasian | 1060 | 8.8  | 6.6  | 1991 | 76 | NA          | NA    |
| CMC_MSSM_261 | MSSM | Control | Female | Caucasian | 1178 | 10.1 | 6.38 | 2005 | 79 | 63.00003402 | 115   |
| CMC_MSSM_264 | MSSM | Control | Male   | Caucasian | 1276 | 5    | 6.43 | 1993 | 75 | 71.00003834 | 93    |
| CMC_MSSM_270 | MSSM | Control | Female | Caucasian | 1130 | 4.3  | 6.3  | 1996 | 85 | 65.0000351  | 113   |
| CMC_MSSM_274 | MSSM | Control | Female | Caucasian | 1000 | 6.7  | 6.6  | 1991 | 89 | NA          | NA    |
| CMC_MSSM_278 | MSSM | Control | Female | Caucasian | 1352 | 2.9  | 6.27 | 1995 | 60 | NA          | 120   |
| CMC_MSSM_280 | MSSM | Control | Female | Caucasian | 939  | 3.8  | 6.4  | 1995 | 85 | NA          | 119   |
| CMC_MSSM_281 | MSSM | Control | Female | Caucasian | 1026 | 7.1  | 6.5  | 1996 | 90 | NA          | 90    |
| CMC_MSSM_282 | MSSM | Control | Male   | Caucasian | 1084 | 7.7  | 6.4  | 1995 | 88 | NA          | 123   |
| CMC_MSSM_292 | MSSM | Control | Female | Caucasian | 961  | 18.5 | 6.21 | 1998 | 84 | 62.00003348 | 180   |
| CMC_MSSM_365 | MSSM | Control | Female | Caucasian | 1107 | 29   | 6.31 | 2000 | 82 | NA          | 100   |
| CMC_MSSM_369 | MSSM | Control | Male   | Caucasian | 1100 | 4.2  | 6.6  | 2003 | 90 | 68.00003672 | 116.4 |
| CMC_MSSM_376 | MSSM | Control | Female | Caucasian | 1080 | 3.4  | 6.3  | 1997 | 73 | 58.00003132 | 140   |
| CMC_MSSM_383 | MSSM | Control | Female | Caucasian | 1188 | 6.2  | 6.76 | 2000 | 83 | 62.00003348 | 210   |
| CMC_MSSM_384 | MSSM | Control | Female | Caucasian | 1078 | 3.5  | 6.2  | 1995 | 90 | 61.00003294 | 133   |
| CMC_MSSM_389 | MSSM | Control | Male   | Caucasian | 1500 | 18   | 6.74 | 1996 | 54 | NA          | NA    |
| CMC_MSSM_391 | MSSM | Control | Male   | Caucasian | 1404 | 33   | 6.27 | 2003 | 75 | 70.0000378  | 155   |
| CMC_MSSM_401 | MSSM | Control | Female | Caucasian | 1014 | 5    | 6.2  | 1989 | 85 | NA          | NA    |
| CMC_MSSM_402 | MSSM | Control | Male   | Caucasian | 1344 | 20.4 | 6.61 | 2003 | 59 | 68.00003672 | 120   |
| CMC_MSSM_407 | MSSM | Control | Female | Caucasian | 1030 | 7.8  | NA   | 2009 | 90 | 59.00003186 | 103   |
| CMC_MSSM_410 | MSSM | Control | Male   | Caucasian | 1119 | 14.5 | 6.1  | 1993 | 86 | NA          | NA    |
| CMC_MSSM_412 | MSSM | Control | Female | Caucasian | 1090 | 10   | 6.3  | 1988 | 73 | NA          | NA    |
| CMC_MSSM_413 | MSSM | Control | Male   | Caucasian | 1176 | 20   | 6.81 | 2003 | 90 | 68.00003672 | 143   |
| CMC_MSSM_419 | MSSM | Control | Female | Caucasian | 1003 | 4.2  | 6    | 1991 | 90 | NA          | NA    |
| CMC_PENN_001 | Penn | Control | Female | Caucasian | 1206 | 22   | NA   | 2011 | 65 | NA          | NA    |
| CMC_PENN_003 | Penn | Control | Male   | Caucasian | 1545 | 15   | NA   | 2011 | 67 | 72.83       | 220   |
| CMC_PENN_004 | Penn | Control | Female | Caucasian | 1034 | 15   | NA   | 2010 | 90 | NA          | NA    |
| CMC_PENN_005 | Penn | Control | Female | Caucasian | 1201 | 19   | NA   | 2011 | 78 | 63          | 200   |
| CMC_PENN_006 | Penn | Control | Female | Caucasian | 1151 | 15   | NA   | 2011 | 68 | 60.24       | 108   |
| CMC_PENN_007 | Penn | Control | Female | Caucasian | 1207 | 19   | 5.97 | 2007 | 65 | NA          | NA    |
| CMC_PENN_009 | Penn | Control | Female | Caucasian | 1026 | 3    | NA   | 2010 | 83 | NA          | NA    |
| CMC_PENN_011 | Penn | Control | Male   | Caucasian | 1554 | 16   | NA   | 2011 | 42 | 68.11       | 187   |
| CMC_PENN_013 | Penn | Control | Male   | Caucasian | 1330 | 21   | NA   | 2010 | 68 | NA          | NA    |
| CMC_PENN_015 | Penn | Control | Male   | Caucasian | 1320 | 13.5 | NA   | 2011 | 72 | NA          | NA    |
| CMC_PENN_016 | Penn | Control | Female | Caucasian | 1300 | 5    | NA   | 2010 | 82 | NA          | NA    |
| CMC_PENN_017 | Penn | Control | Female | Caucasian | 1107 | 5    | 6.5  | 2002 | 90 | NA          | NA    |

|              |      |         |        |           |      |      |      |      |    |       |     |
|--------------|------|---------|--------|-----------|------|------|------|------|----|-------|-----|
| CMC_PENN_018 | Penn | Control | Male   | Caucasian | 1388 | 10.5 | NA   | 2003 | 70 | NA    | NA  |
| CMC_PENN_019 | Penn | Control | Female | Caucasian | 1198 | 14   | NA   | 2006 | 85 | NA    | NA  |
| CMC_PENN_021 | Penn | Control | Male   | Caucasian | 1625 | 11   | 6.49 | 1998 | 69 | NA    | NA  |
| CMC_PENN_022 | Penn | Control | Female | Caucasian | 1280 | 6    | 6.93 | 1992 | 36 | 72.44 | 285 |
| CMC_PENN_025 | Penn | Control | Male   | Caucasian | 1202 | 7    | 6.34 | 2003 | 85 | NA    | NA  |
| CMC_PENN_026 | Penn | Control | Male   | Caucasian | NA   | 12   | 6.48 | 1986 | 29 | 65.75 | 187 |
| CMC_PENN_028 | Penn | Control | Male   | Caucasian | 1333 | 11   | NA   | 2011 | 47 | 68.11 | 195 |
| CMC_PENN_029 | Penn | Control | Male   | Caucasian | 1369 | 6    | NA   | 2010 | 61 | NA    | NA  |
| CMC_PENN_077 | Penn | Control | Male   | Caucasian | 1502 | 18   | NA   | 2012 | 59 | 70.08 | 210 |
| CMC_PENN_080 | Penn | Control | Female | Caucasian | 1245 | 24   | NA   | 2011 | 67 | 57.87 | 129 |
| CMC_PENN_081 | Penn | Control | Male   | Caucasian | 1755 | 36   | NA   | 2012 | 70 | NA    | NA  |
| CMC_PENN_085 | Penn | Control | Female | Caucasian | 1250 | 6    | 6.16 | 1993 | 74 | NA    | NA  |
| CMC_PENN_086 | Penn | Control | Female | Caucasian | 1080 | 11   | 6.45 | 1990 | 85 | NA    | NA  |
| CMC_PENN_088 | Penn | Control | Male   | Caucasian | 1488 | 19   | 6.68 | 1996 | 70 | 68.5  | 160 |
| CMC_PITT_001 | Pitt | Control | Male   | Caucasian | 1290 | 21.2 | 6.5  | 2004 | 49 | 63    | 165 |
| CMC_PITT_002 | Pitt | Control | Male   | Caucasian | 1500 | 23.5 | 6.7  | 2004 | 42 | 74    | 278 |
| CMC_PITT_008 | Pitt | Control | Male   | Caucasian | 1355 | 20   | 6.3  | 2002 | 59 | 70    | 180 |
| CMC_PITT_009 | Pitt | Control | Male   | Caucasian | 1410 | 13.8 | 6.6  | 2002 | 43 | 72    | 217 |
| CMC_PITT_010 | Pitt | Control | Male   | Caucasian | 1515 | 24.2 | 6.8  | 2003 | 51 | 70    | 178 |
| CMC_PITT_013 | Pitt | Control | Female | Caucasian | 1240 | 9.1  | 6.5  | 2003 | 24 | 67    | 116 |
| CMC_PITT_015 | Pitt | Control | Male   | Caucasian | 1360 | 15.4 | 6.7  | 2003 | 55 | 68.5  | 195 |
| CMC_PITT_022 | Pitt | Control | Female | Caucasian | 1220 | 16.4 | 6.2  | 2004 | 52 | 63    | 164 |
| CMC_PITT_028 | Pitt | Control | Female | Caucasian | 1315 | 22.7 | 6.4  | 2004 | 58 | 70    | 250 |
| CMC_PITT_032 | Pitt | Control | Female | Caucasian | 1245 | 19.7 | 6.7  | 2005 | 73 | 65    | 148 |
| CMC_PITT_033 | Pitt | Control | Female | Caucasian | 1240 | 24.5 | 6.8  | 2005 | 39 | 64    | 178 |
| CMC_PITT_034 | Pitt | Control | Male   | Caucasian | 1330 | 6.4  | 6.8  | 2005 | 55 | 67    | 161 |
| CMC_PITT_038 | Pitt | Control | Male   | Caucasian | 1310 | 22.3 | 7    | 2005 | 43 | 69.5  | 212 |
| CMC_PITT_039 | Pitt | Control | Male   | Caucasian | 1515 | 16.4 | 6.7  | 2006 | 58 | 68    | 211 |
| CMC_PITT_040 | Pitt | Control | Male   | Caucasian | 1430 | 18.4 | 6.8  | 2006 | 65 | 72    | 205 |
| CMC_PITT_042 | Pitt | Control | Male   | Caucasian | 1470 | 24.2 | 6.4  | 2006 | 21 | 67    | 150 |
| CMC_PITT_045 | Pitt | Control | Male   | Caucasian | 1505 | 20.5 | 6.6  | 2006 | 37 | 73    | 289 |
| CMC_PITT_046 | Pitt | Control | Male   | Caucasian | 1385 | 21.7 | 6.6  | 2006 | 43 | 69    | 278 |
| CMC_PITT_047 | Pitt | Control | Male   | Caucasian | 1450 | 21.2 | 6.7  | 2006 | 46 | 70    | 200 |
| CMC_PITT_048 | Pitt | Control | Female | Caucasian | 1335 | 7.8  | 6.6  | 2006 | 51 | 65    | 170 |
| CMC_PITT_050 | Pitt | Control | Male   | Caucasian | 1440 | 24.1 | 6.8  | 2007 | 65 | 71    | 216 |
| CMC_PITT_055 | Pitt | Control | Male   | Caucasian | 1495 | 23.8 | 6.5  | 2008 | 61 | 68    | 160 |
| CMC_PITT_058 | Pitt | Control | Male   | Caucasian | 1355 | 20.7 | 6.4  | 2008 | 50 | 70    | 175 |
| CMC_PITT_059 | Pitt | Control | Male   | Caucasian | 1555 | 9.4  | 6.4  | 2009 | 66 | 67    | 110 |
| CMC_PITT_061 | Pitt | Control | Female | Caucasian | 1295 | 17.9 | 6.8  | 2009 | 45 | 61    | 122 |
| CMC_PITT_062 | Pitt | Control | Male   | Caucasian | 1460 | 23.2 | 6.5  | 2009 | 50 | 71.5  | 263 |
| CMC_PITT_063 | Pitt | Control | Male   | Caucasian | 1460 | 15.1 | 6.9  | 2009 | 17 | 78    | 178 |
| CMC_PITT_064 | Pitt | Control | Male   | Caucasian | 1470 | 24.4 | 6.9  | 2009 | 54 | 73    | 156 |
| CMC_PITT_067 | Pitt | Control | Male   | Caucasian | 1550 | 19.1 | 6.8  | 2009 | 58 | 66.5  | 146 |
| CMC_PITT_068 | Pitt | Control | Male   | Caucasian | 1450 | 25.3 | 6.8  | 2010 | 66 | 68    | 176 |
| CMC_PITT_075 | Pitt | Control | Female | Caucasian | 1240 | 28.1 | 6.5  | 2012 | 36 | 69    | 142 |
| CMC_PITT_080 | Pitt | Control | Female | Caucasian | 1190 | 22.5 | 6.7  | 1995 | 37 | NA    | NA  |
| CMC_PITT_082 | Pitt | Control | Male   | Caucasian | 1415 | 16.4 | 6.6  | 1995 | 61 | NA    | NA  |
| CMC_PITT_088 | Pitt | Control | Male   | Caucasian | 1560 | 18.8 | 7.1  | 1996 | 39 | NA    | NA  |
| CMC_PITT_092 | Pitt | Control | Male   | Caucasian | 1325 | 21.2 | 7    | 1996 | 65 | NA    | NA  |
| CMC_PITT_093 | Pitt | Control | Male   | Caucasian | 1620 | 16.2 | 7    | 1996 | 52 | NA    | NA  |
| CMC_PITT_097 | Pitt | Control | Male   | Caucasian | 1560 | 11.5 | 7.2  | 1997 | 51 | 70    | 320 |
| CMC_PITT_098 | Pitt | Control | Male   | Caucasian | 1285 | 14.5 | 6.6  | 1997 | 56 | NA    | 186 |
| CMC_PITT_099 | Pitt | Control | Female | Caucasian | 1240 | 22.6 | 7    | 1997 | 52 | NA    | 196 |
| CMC_PITT_100 | Pitt | Control | Male   | Caucasian | 1565 | 20.7 | 7    | 1997 | 38 | NA    | NA  |
| CMC_PITT_101 | Pitt | Control | Male   | Caucasian | 1670 | 26.1 | 7    | 1997 | 42 | NA    | NA  |
| CMC_PITT_104 | Pitt | Control | Male   | Caucasian | 1450 | 15.8 | 6.9  | 1997 | 40 | NA    | NA  |
| CMC_PITT_108 | Pitt | Control | Male   | Caucasian | 1555 | 24   | 6.9  | 1999 | 57 | NA    | NA  |
| CMC_PITT_109 | Pitt | Control | Female | Caucasian | 1285 | 24   | 7.1  | 1999 | 67 | NA    | NA  |
| CMC_PITT_112 | Pitt | Control | Male   | Caucasian | 1490 | 8.2  | 6.8  | 1999 | 54 | NA    | NA  |
| CMC_PITT_113 | Pitt | Control | Male   | Caucasian | 1575 | 16.6 | 6.7  | 2000 | 48 | NA    | NA  |
| CMC_PITT_116 | Pitt | Control | Male   | Caucasian | 1680 | 23.6 | 6.7  | 2000 | 60 | 69    | 171 |
| CMC_PITT_121 | Pitt | Control | Male   | Caucasian | 1500 | 25.9 | 6.4  | 2001 | 42 | 70    | 199 |
| CMC_PITT_122 | Pitt | Control | Female | Caucasian | 1305 | 21.5 | 6.8  | 2001 | 65 | 62    | 145 |
| CMC_PITT_123 | Pitt | Control | Male   | Caucasian | 1440 | 22.5 | 6.2  | 2001 | 82 | 67    | 189 |
| CMC_PITT_129 | Pitt | Control | Male   | Caucasian | 1460 | 23.2 | 6.8  | 2002 | 53 | 69    | 236 |
| CMC_PITT_133 | Pitt | Control | Female | Caucasian | 1435 | 14.9 | 6.8  | 2003 | 57 | 62    | 147 |

|              |      |         |        |           |      |      |      |      |    |             |       |
|--------------|------|---------|--------|-----------|------|------|------|------|----|-------------|-------|
| CMC_PITT_137 | Pitt | Control | Male   | Caucasian | 1460 | 28   | 6.1  | 2003 | 55 | 71          | 245   |
| CMC_PITT_140 | Pitt | Control | Female | Caucasian | 1280 | 14.5 | 6.4  | 2004 | 36 | 64          | 136   |
| CMC_PITT_143 | Pitt | Control | Female | Caucasian | 1360 | 18.5 | 6.5  | 2005 | 65 | 63          | 111   |
| CMC_PITT_144 | Pitt | Control | Male   | Caucasian | 1325 | 24.5 | 6.5  | 2005 | 48 | 70          | 254   |
| CMC_PITT_146 | Pitt | Control | Male   | Caucasian | 1475 | 17.3 | 6.6  | 2006 | 45 | 65          | 140   |
| CMC_PITT_147 | Pitt | Control | Female | Caucasian | 1345 | 12.3 | 6.7  | 2007 | 45 | 68          | 148   |
| CMC_PITT_149 | Pitt | Control | Male   | Caucasian | 1575 | 22   | 6.3  | 2007 | 46 | 71          | 218   |
| CMC_PITT_153 | Pitt | Control | Male   | Caucasian | 1350 | 20.2 | 6.6  | 2008 | 25 | 68          | 234   |
| CMC_PITT_155 | Pitt | Control | Male   | Caucasian | 1575 | 16.9 | 6.7  | 2008 | 25 | 68          | 123   |
| CMC_PITT_161 | Pitt | Control | Male   | Caucasian | 1430 | 23.8 | 6.9  | 2010 | 50 | 69          | 199   |
| CMC_PITT_163 | Pitt | Control | Female | Caucasian | 1345 | 23.9 | 6.9  | 2010 | 21 | 65          | 161   |
| CMC_PITT_165 | Pitt | Control | Male   | Caucasian | 1460 | 16.6 | 6.9  | 2010 | 46 | 69          | 223   |
| CMC_PITT_166 | Pitt | Control | Female | Caucasian | 1130 | 8.5  | 6.7  | 2011 | 67 | 66          | 157   |
| CMC_PITT_168 | Pitt | Control | Male   | Caucasian | 1600 | 28.2 | 6.8  | 2012 | 52 | 74          | 234   |
| CMC_PITT_169 | Pitt | Control | Female | Caucasian | 1290 | 15.9 | 6.8  | 2012 | 23 | 70          | 206   |
| CMC_PITT_170 | Pitt | Control | Female | Caucasian | 1340 | 13.7 | 6.8  | 2012 | 53 | 63          | 193   |
| CMC_PITT_173 | Pitt | Control | Male   | Caucasian | 1505 | 20.1 | 6.8  | 1998 | 22 | 77          | 197   |
| CMC_PITT_174 | Pitt | Control | Male   | Caucasian | 1400 | 11.8 | 6.8  | 1998 | 68 | 70          | 200   |
| CMC_PITT_175 | Pitt | Control | Male   | Caucasian | 1440 | 16.5 | 7    | 1999 | 58 | 70.5        | 173   |
| CMC_PITT_176 | Pitt | Control | Female | Caucasian | 1400 | 15.4 | 6.6  | 1999 | 41 | 64          | 152   |
| CMC_PITT_177 | Pitt | Control | Male   | Caucasian | 1215 | 21.2 | 7.2  | 1999 | 70 | 68          | 175   |
| CMC_MSSM_025 | MSSM | SCZ     | Male   | Caucasian | 1216 | 8.9  | 6.27 | 2002 | 68 | NA          | NA    |
| CMC_MSSM_027 | MSSM | SCZ     | Male   | Caucasian | 1239 | 12.1 | 6.5  | 1994 | 66 | NA          | NA    |
| CMC_MSSM_028 | MSSM | SCZ     | Female | Caucasian | 1038 | 21.2 | 6.1  | 1995 | 76 | NA          | NA    |
| CMC_MSSM_042 | MSSM | SCZ     | Male   | Caucasian | 1437 | 2.8  | 6.4  | 1993 | 61 | NA          | NA    |
| CMC_MSSM_048 | MSSM | SCZ     | Male   | Caucasian | 1259 | 17.7 | 6.71 | 2001 | 84 | NA          | NA    |
| CMC_MSSM_059 | MSSM | SCZ     | Male   | Caucasian | 1377 | 21.4 | 6.43 | 2000 | 57 | NA          | NA    |
| CMC_MSSM_062 | MSSM | SCZ     | Male   | Caucasian | 1457 | 11   | 7.1  | 1994 | 75 | NA          | NA    |
| CMC_MSSM_097 | MSSM | SCZ     | Male   | Caucasian | 1036 | 50.6 | 6.1  | 1992 | 73 | NA          | NA    |
| CMC_MSSM_111 | MSSM | SCZ     | Male   | Caucasian | 1434 | 20.9 | 6.61 | 2006 | 54 | 74.00003996 | 207   |
| CMC_MSSM_113 | MSSM | SCZ     | Male   | Caucasian | 1146 | 5.8  | 6.45 | 2002 | 75 | 65.0000351  | 106   |
| CMC_MSSM_115 | MSSM | SCZ     | Female | Caucasian | 1398 | 22.3 | NA   | 2004 | 50 | 68.00003672 | 140   |
| CMC_MSSM_116 | MSSM | SCZ     | Female | Caucasian | 1226 | 16.6 | NA   | 2008 | 74 | 62.00003348 | 179   |
| CMC_MSSM_118 | MSSM | SCZ     | Male   | Caucasian | 1482 | 14.8 | NA   | 2009 | 54 | NA          | NA    |
| CMC_MSSM_119 | MSSM | SCZ     | Male   | Caucasian | 1081 | 48.3 | 6.9  | 1992 | 82 | NA          | NA    |
| CMC_MSSM_132 | MSSM | SCZ     | Female | Caucasian | 1076 | 15.1 | 6.47 | 2003 | 81 | 64.00003456 | 125.4 |
| CMC_MSSM_133 | MSSM | SCZ     | Male   | Caucasian | 1324 | 14.3 | 6.49 | 2001 | 70 | 70.0000378  | 110.5 |
| CMC_MSSM_139 | MSSM | SCZ     | Female | Caucasian | 1055 | 14.4 | 6.7  | 1990 | 71 | NA          | NA    |
| CMC_MSSM_142 | MSSM | SCZ     | Female | Caucasian | 1050 | 3.4  | 6.2  | 1993 | 79 | 64.00003456 | 90    |
| CMC_MSSM_161 | MSSM | SCZ     | Female | Caucasian | 1091 | 33.3 | 6.6  | 1991 | 86 | NA          | NA    |
| CMC_MSSM_163 | MSSM | SCZ     | Male   | Caucasian | 1207 | 33.8 | 6.7  | 1992 | 83 | NA          | NA    |
| CMC_MSSM_166 | MSSM | SCZ     | Male   | Caucasian | 1339 | 50.8 | 6.5  | 1992 | 73 | NA          | NA    |
| CMC_MSSM_168 | MSSM | SCZ     | Male   | Caucasian | 1001 | 3.3  | 6.1  | 1992 | 73 | NA          | NA    |
| CMC_MSSM_169 | MSSM | SCZ     | Male   | Caucasian | 1186 | 49.2 | 6.6  | 1993 | 76 | NA          | NA    |
| CMC_MSSM_180 | MSSM | SCZ     | Male   | Caucasian | 1416 | 40.4 | 7    | 1993 | 90 | NA          | NA    |
| CMC_MSSM_192 | MSSM | SCZ     | Male   | Caucasian | 1216 | 7    | 6.3  | 1993 | 86 | NA          | NA    |
| CMC_MSSM_193 | MSSM | SCZ     | Male   | Caucasian | 1146 | 9.8  | NA   | 2010 | 70 | 68.00003672 | 143   |
| CMC_MSSM_194 | MSSM | SCZ     | Female | Caucasian | 1085 | 7.3  | 6.1  | 1990 | 90 | 60.0000324  | 95    |
| CMC_MSSM_196 | MSSM | SCZ     | Female | Caucasian | 920  | 5.5  | 6.2  | 1990 | 86 | NA          | NA    |
| CMC_MSSM_197 | MSSM | SCZ     | Male   | Caucasian | 1374 | 20.6 | 6.6  | 1992 | 74 | NA          | NA    |
| CMC_MSSM_198 | MSSM | SCZ     | Male   | Caucasian | 1408 | 53.6 | 7    | 1992 | 63 | NA          | NA    |
| CMC_MSSM_199 | MSSM | SCZ     | Female | Caucasian | 1021 | 49.9 | 6.2  | 1992 | 82 | NA          | NA    |
| CMC_MSSM_200 | MSSM | SCZ     | Male   | Caucasian | 1021 | 49.9 | 6.4  | 1992 | 79 | NA          | NA    |
| CMC_MSSM_201 | MSSM | SCZ     | Female | Caucasian | 1258 | 44.4 | 6.4  | 1992 | 84 | 71.00003834 | 140   |
| CMC_MSSM_204 | MSSM | SCZ     | Male   | Caucasian | 1290 | 50   | 6.5  | 1992 | 87 | 67.00003618 | 130   |
| CMC_MSSM_205 | MSSM | SCZ     | Male   | Caucasian | 1299 | 34   | 6.6  | 1992 | 81 | NA          | NA    |
| CMC_MSSM_209 | MSSM | SCZ     | Male   | Caucasian | 1081 | 3.4  | 6.4  | 1994 | 77 | NA          | NA    |
| CMC_MSSM_210 | MSSM | SCZ     | Male   | Caucasian | 1304 | 33.3 | 6.1  | 1996 | 66 | NA          | 83    |
| CMC_MSSM_213 | MSSM | SCZ     | Male   | Caucasian | 1440 | 43   | 6.1  | 1996 | 62 | NA          | NA    |
| CMC_MSSM_216 | MSSM | SCZ     | Female | Caucasian | 1118 | 36.1 | 6.2  | 1994 | 64 | NA          | NA    |
| CMC_MSSM_218 | MSSM | SCZ     | Male   | Caucasian | 1283 | 49.5 | 6.4  | 1995 | 76 | NA          | NA    |
| CMC_MSSM_222 | MSSM | SCZ     | Male   | Caucasian | 1040 | 14.6 | 6.85 | 1997 | 68 | NA          | NA    |
| CMC_MSSM_250 | MSSM | SCZ     | Male   | Caucasian | 1157 | 23.1 | 6.6  | 2000 | 41 | NA          | NA    |
| CMC_MSSM_253 | MSSM | SCZ     | Female | Caucasian | 1472 | 5.6  | 6.8  | 1992 | 75 | 62.00003348 | 127   |
| CMC_MSSM_254 | MSSM | SCZ     | Male   | Caucasian | 1330 | 47.7 | 6.9  | 1991 | 64 | NA          | NA    |
| CMC_MSSM_255 | MSSM | SCZ     | Female | Caucasian | 1053 | 48.3 | 6    | 1990 | 77 | 62.00003348 | 100   |

|              |      |     |        |           |      |      |      |      |    |             |       |
|--------------|------|-----|--------|-----------|------|------|------|------|----|-------------|-------|
| CMC_MSSM_258 | MSSM | SCZ | Female | Caucasian | 1362 | 6.5  | 6.6  | 2005 | 64 | 63.00003402 | 198   |
| CMC_MSSM_260 | MSSM | SCZ | Female | Caucasian | 960  | 21.5 | 6.49 | 2002 | 75 | 65.0000351  | 136   |
| CMC_MSSM_262 | MSSM | SCZ | Male   | Caucasian | 1942 | 26.1 | 6.64 | 2005 | 78 | 67.00003618 | 138   |
| CMC_MSSM_265 | MSSM | SCZ | Male   | Caucasian | 983  | 23.8 | 6.2  | 1992 | 84 | NA          | NA    |
| CMC_MSSM_266 | MSSM | SCZ | Male   | Caucasian | 1133 | 26   | 6.1  | 1992 | 81 | NA          | NA    |
| CMC_MSSM_269 | MSSM | SCZ | Male   | Caucasian | 1356 | 7.4  | 6.5  | 2006 | 79 | NA          | NA    |
| CMC_MSSM_271 | MSSM | SCZ | Female | Caucasian | 1120 | 23.7 | 6.74 | 2006 | 62 | 65.0000351  | 176   |
| CMC_MSSM_277 | MSSM | SCZ | Male   | Caucasian | 1057 | 30   | 6.9  | 1997 | 58 | NA          | NA    |
| CMC_MSSM_279 | MSSM | SCZ | Male   | Caucasian | 939  | 11.8 | 6.2  | 1995 | 77 | NA          | NA    |
| CMC_MSSM_288 | MSSM | SCZ | Male   | Caucasian | 1062 | 31.8 | 6.31 | 2006 | 69 | 71.00003834 | 143.3 |
| CMC_MSSM_289 | MSSM | SCZ | Male   | Caucasian | 1202 | 28   | 6.58 | 2006 | 82 | 68.00003672 | 175   |
| CMC_MSSM_291 | MSSM | SCZ | Male   | Caucasian | 1576 | 32.3 | 6.48 | 2004 | 84 | 64.00003456 | 114   |
| CMC_MSSM_294 | MSSM | SCZ | Male   | Caucasian | 1420 | 30.5 | 6.51 | 2005 | 46 | 70.0000378  | 280   |
| CMC_MSSM_295 | MSSM | SCZ | Male   | Caucasian | 1166 | 34.1 | 6.8  | 2005 | 62 | NA          | 142   |
| CMC_MSSM_296 | MSSM | SCZ | Female | Caucasian | 1390 | 19.8 | 6.27 | 2005 | 88 | 61.00003294 | 129   |
| CMC_MSSM_297 | MSSM | SCZ | Male   | Caucasian | 1144 | 27   | 6.75 | 2010 | 47 | 73.00003942 | 270   |
| CMC_MSSM_298 | MSSM | SCZ | Female | Caucasian | 1084 | 40.8 | NA   | 2007 | 65 | 63.00003402 | 129   |
| CMC_MSSM_299 | MSSM | SCZ | Female | Caucasian | 1440 | 29.9 | 6.4  | 2011 | 59 | 62.00003348 | 168   |
| CMC_MSSM_300 | MSSM | SCZ | Male   | Caucasian | 932  | 43.6 | NA   | 2007 | 72 | NA          | NA    |
| CMC_MSSM_304 | MSSM | SCZ | Male   | Caucasian | 1114 | 47.3 | NA   | 2009 | 76 | 73.00003942 | 216   |
| CMC_MSSM_305 | MSSM | SCZ | Female | Caucasian | 1382 | 7.6  | NA   | 2010 | 86 | 64.00003456 | 102   |
| CMC_MSSM_306 | MSSM | SCZ | Male   | Caucasian | 1422 | 25.5 | NA   | 2010 | 65 | 71.00003834 | 208   |
| CMC_MSSM_309 | MSSM | SCZ | Female | Caucasian | 1084 | 3.7  | NA   | 2003 | 84 | 65.0000351  | 128   |
| CMC_MSSM_310 | MSSM | SCZ | Female | Caucasian | 1196 | 48.8 | 6.49 | 2003 | 90 | NA          | NA    |
| CMC_MSSM_311 | MSSM | SCZ | Female | Caucasian | 1492 | 25.8 | 6.78 | 2002 | 62 | 63.00003402 | 177   |
| CMC_MSSM_312 | MSSM | SCZ | Male   | Caucasian | 1380 | 48.1 | 6.72 | 2002 | 68 | 71.00003834 | 197   |
| CMC_MSSM_313 | MSSM | SCZ | Male   | Caucasian | 1112 | 48.3 | 6.41 | 2002 | 67 | 72.00003888 | 185   |
| CMC_MSSM_319 | MSSM | SCZ | Male   | Caucasian | 810  | 27   | 6.19 | 2003 | 52 | 74.00003996 | 273   |
| CMC_MSSM_321 | MSSM | SCZ | Male   | Caucasian | 1260 | 25.5 | 6.53 | 2002 | 48 | 73.00003942 | 224   |
| CMC_MSSM_322 | MSSM | SCZ | Male   | Caucasian | 1042 | 15.2 | 6.49 | 2001 | 85 | NA          | NA    |
| CMC_MSSM_323 | MSSM | SCZ | Male   | Caucasian | 1054 | 7.7  | 6.2  | 2001 | 89 | NA          | NA    |
| CMC_MSSM_326 | MSSM | SCZ | Male   | Caucasian | 1044 | 48.6 | 6.13 | 2001 | 82 | NA          | NA    |
| CMC_MSSM_331 | MSSM | SCZ | Female | Caucasian | 1180 | 29.9 | 6.53 | 1996 | 67 | NA          | 111   |
| CMC_MSSM_332 | MSSM | SCZ | Female | Caucasian | 1287 | 46.4 | 6.8  | 2000 | 73 | NA          | NA    |
| CMC_MSSM_335 | MSSM | SCZ | Male   | Caucasian | 1054 | 27.3 | 6.65 | 2000 | 32 | 65.0000351  | 282   |
| CMC_MSSM_336 | MSSM | SCZ | Female | Caucasian | 1125 | 9.6  | 6.2  | 2000 | 89 | NA          | NA    |
| CMC_MSSM_337 | MSSM | SCZ | Female | Caucasian | 1355 | 10.3 | 6.11 | 1998 | 59 | NA          | NA    |
| CMC_MSSM_339 | MSSM | SCZ | Male   | Caucasian | 1325 | 31.8 | NA   | 1999 | 58 | NA          | NA    |
| CMC_MSSM_343 | MSSM | SCZ | Female | Caucasian | 1491 | 21.9 | 6.34 | 2000 | 59 | NA          | NA    |
| CMC_MSSM_344 | MSSM | SCZ | Male   | Caucasian | 1222 | 48.6 | 6.48 | 2000 | 90 | 56.00003024 | 116   |
| CMC_MSSM_345 | MSSM | SCZ | Male   | Caucasian | 1338 | 9.2  | 6.09 | 2000 | 79 | NA          | NA    |
| CMC_MSSM_346 | MSSM | SCZ | Male   | Caucasian | 1076 | 3.5  | 6.35 | 2000 | 68 | NA          | NA    |
| CMC_MSSM_347 | MSSM | SCZ | Male   | Caucasian | 1304 | 11.4 | 6.74 | 2001 | 82 | NA          | NA    |
| CMC_MSSM_348 | MSSM | SCZ | Female | Caucasian | 1254 | 45   | 6.45 | 1996 | 89 | NA          | NA    |
| CMC_MSSM_349 | MSSM | SCZ | Male   | Caucasian | 1069 | 46.7 | 6.2  | 1993 | 79 | 66.00003564 | 138   |
| CMC_MSSM_352 | MSSM | SCZ | Male   | Caucasian | 1014 | 4.3  | 6.29 | 1997 | 64 | NA          | NA    |
| CMC_MSSM_354 | MSSM | SCZ | Male   | Caucasian | 1166 | 25.5 | 6.8  | 1992 | 83 | NA          | NA    |
| CMC_MSSM_355 | MSSM | SCZ | Female | Caucasian | 1108 | 25.8 | 6.5  | 2008 | 90 | 64.00003456 | 90    |
| CMC_MSSM_356 | MSSM | SCZ | Female | Caucasian | 1139 | 42.3 | NA   | 1992 | 81 | NA          | 86    |
| CMC_MSSM_359 | MSSM | SCZ | Male   | Caucasian | 1282 | 8.8  | 6.15 | 2001 | 73 | NA          | NA    |
| CMC_MSSM_360 | MSSM | SCZ | Female | Caucasian | 1008 | 7.8  | 6.57 | 2001 | 90 | NA          | NA    |
| CMC_MSSM_361 | MSSM | SCZ | Male   | Caucasian | 1262 | 24   | 6.4  | 2001 | 77 | NA          | NA    |
| CMC_MSSM_362 | MSSM | SCZ | Male   | Caucasian | 1194 | 7.2  | 6.35 | 2001 | 73 | NA          | NA    |
| CMC_MSSM_363 | MSSM | SCZ | Female | Caucasian | 1068 | 9.7  | 6.01 | 2001 | 77 | NA          | NA    |
| CMC_MSSM_364 | MSSM | SCZ | Male   | Caucasian | 1650 | 13.5 | 6.45 | 2002 | 56 | NA          | NA    |
| CMC_MSSM_366 | MSSM | SCZ | Male   | Caucasian | 1144 | 5.3  | 7    | 1991 | 84 | NA          | NA    |
| CMC_MSSM_367 | MSSM | SCZ | Male   | Caucasian | 1221 | 5.3  | 6.2  | 1994 | 86 | NA          | 162   |
| CMC_MSSM_370 | MSSM | SCZ | Female | Caucasian | 1204 | 5.5  | 6.6  | 1992 | 71 | NA          | NA    |
| CMC_MSSM_372 | MSSM | SCZ | Male   | Caucasian | 1020 | 17.7 | 6.59 | 1998 | 90 | NA          | NA    |
| CMC_MSSM_373 | MSSM | SCZ | Male   | Caucasian | 1070 | 26   | 6.67 | 1999 | 90 | NA          | NA    |
| CMC_MSSM_377 | MSSM | SCZ | Male   | Caucasian | 1134 | 8.4  | 6.69 | 1998 | 66 | NA          | NA    |
| CMC_MSSM_379 | MSSM | SCZ | Male   | Caucasian | 1222 | 9.5  | NA   | 2007 | 71 | 67.00003618 | 156   |
| CMC_MSSM_382 | MSSM | SCZ | Male   | Caucasian | 1309 | 7.9  | 6.5  | 1994 | 73 | NA          | NA    |
| CMC_MSSM_385 | MSSM | SCZ | Male   | Caucasian | 1042 | 16.6 | 6.7  | 2000 | 76 | NA          | NA    |
| CMC_MSSM_386 | MSSM | SCZ | Male   | Caucasian | 1261 | 5.3  | 6.3  | 1994 | 85 | NA          | NA    |
| CMC_MSSM_388 | MSSM | SCZ | Female | Caucasian | 1210 | 6.9  | 6.4  | 1989 | 80 | 49.00002646 | 184   |



|              |      |     |        |           |      |      |      |      |    |       |       |
|--------------|------|-----|--------|-----------|------|------|------|------|----|-------|-------|
| CMC_MSSM_390 | MSSM | SCZ | Male   | Caucasian | 1401 | 14.1 | 6.65 | 1997 | 86 | NA    | 127   |
| CMC_MSSM_403 | MSSM | SCZ | Male   | Caucasian | 1303 | 40.2 | 6.68 | 2000 | 69 | NA    | NA    |
| CMC_MSSM_404 | MSSM | SCZ | Male   | Caucasian | 1109 | 3    | 6.1  | 1991 | 61 | NA    | NA    |
| CMC_MSSM_415 | MSSM | SCZ | Male   | Caucasian | 1238 | 6.7  | 6.2  | 1990 | 58 | NA    | NA    |
| CMC_MSSM_416 | MSSM | SCZ | Female | Caucasian | 1033 | 8.5  | 6.1  | 1991 | 76 | NA    | NA    |
| CMC_MSSM_420 | MSSM | SCZ | Male   | Caucasian | 1223 | 6.2  | 6.5  | 1992 | 63 | NA    | NA    |
| CMC_MSSM_421 | MSSM | SCZ | Female | Caucasian | 966  | 13.7 | 6.2  | 1992 | 69 | NA    | NA    |
| CMC_MSSM_422 | MSSM | SCZ | Male   | Caucasian | 1022 | 11.2 | 6.5  | 1992 | 87 | NA    | NA    |
| CMC_PENN_030 | Penn | SCZ | Female | Caucasian | 1244 | 16   | 6.48 | 1997 | 88 | NA    | NA    |
| CMC_PENN_031 | Penn | SCZ | Female | Caucasian | 1400 | 16   | 6.29 | 1997 | 80 | NA    | NA    |
| CMC_PENN_032 | Penn | SCZ | Male   | Caucasian | 1420 | 30   | 6.49 | 1990 | 86 | 65.35 | 125   |
| CMC_PENN_034 | Penn | SCZ | Male   | Caucasian | 1270 | 12   | 6.24 | 1992 | 71 | NA    | NA    |
| CMC_PENN_035 | Penn | SCZ | Female | Caucasian | 1021 | 33.5 | NA   | 2006 | 87 | NA    | NA    |
| CMC_PENN_036 | Penn | SCZ | Female | Caucasian | 1002 | 10   | 6.77 | 1998 | 76 | NA    | NA    |
| CMC_PENN_037 | Penn | SCZ | Female | Caucasian | 1060 | 11   | 6.5  | 1994 | 80 | NA    | NA    |
| CMC_PENN_038 | Penn | SCZ | Male   | Caucasian | 1341 | 15   | 6.42 | 1994 | 89 | NA    | NA    |
| CMC_PENN_039 | Penn | SCZ | Male   | Caucasian | 1386 | 9    | NA   | 2004 | 81 | NA    | NA    |
| CMC_PENN_040 | Penn | SCZ | Female | Caucasian | 1097 | 11   | 6.63 | 1997 | 75 | NA    | NA    |
| CMC_PENN_041 | Penn | SCZ | Male   | Caucasian | 1310 | 12   | 6.67 | 1998 | 86 | NA    | NA    |
| CMC_PENN_042 | Penn | SCZ | Female | Caucasian | 990  | 7    | 6.88 | 1999 | 88 | NA    | NA    |
| CMC_PENN_044 | Penn | SCZ | Female | Caucasian | 1219 | 16   | 6.55 | 1996 | 75 | NA    | NA    |
| CMC_PENN_045 | Penn | SCZ | Female | Caucasian | 1040 | 8    | 6.25 | 1991 | 79 | 61.02 | 175   |
| CMC_PENN_046 | Penn | SCZ | Female | Caucasian | 1120 | 17.5 | 6.26 | 2001 | 70 | NA    | NA    |
| CMC_PENN_047 | Penn | SCZ | Male   | Caucasian | 1360 | 19   | 6.32 | 1990 | 78 | NA    | 75    |
| CMC_PENN_048 | Penn | SCZ | Female | Caucasian | 951  | 6    | NA   | 2008 | 66 | NA    | NA    |
| CMC_PENN_050 | Penn | SCZ | Male   | Caucasian | 1503 | 13.5 | 6.26 | 1996 | 69 | NA    | NA    |
| CMC_PENN_051 | Penn | SCZ | Female | Caucasian | 935  | 9.5  | 6.61 | 1996 | 77 | NA    | NA    |
| CMC_PENN_053 | Penn | SCZ | Female | Caucasian | 980  | 7.5  | 6.58 | 2001 | 86 | NA    | NA    |
| CMC_PENN_054 | Penn | SCZ | Male   | Caucasian | 1466 | 48   | NA   | 2009 | 26 | NA    | NA    |
| CMC_PENN_056 | Penn | SCZ | Female | Caucasian | 1140 | 15   | 6.62 | 1992 | 74 | NA    | NA    |
| CMC_PENN_057 | Penn | SCZ | Male   | Caucasian | 1385 | 5    | 6.6  | 2002 | 81 | NA    | NA    |
| CMC_PENN_058 | Penn | SCZ | Female | Caucasian | 1008 | 20   | NA   | 2008 | 89 | NA    | NA    |
| CMC_PENN_059 | Penn | SCZ | Female | Caucasian | 1222 | 7.5  | 6.57 | 2002 | 83 | NA    | NA    |
| CMC_PENN_060 | Penn | SCZ | Female | Caucasian | 1110 | 9.5  | 6.52 | 2002 | 76 | NA    | NA    |
| CMC_PENN_061 | Penn | SCZ | Male   | Caucasian | 1366 | 32   | NA   | 2011 | 86 | NA    | NA    |
| CMC_PENN_062 | Penn | SCZ | Male   | Caucasian | 1080 | 19.5 | 6.54 | 1988 | 82 | 61.81 | 140   |
| CMC_PENN_063 | Penn | SCZ | Male   | Caucasian | 1458 | 18   | NA   | 2008 | 83 | NA    | NA    |
| CMC_PENN_064 | Penn | SCZ | Female | Caucasian | 1200 | 11   | 6.22 | 1990 | 76 | 61.81 | 140   |
| CMC_PENN_065 | Penn | SCZ | Female | Caucasian | 1040 | 6.5  | 6.23 | 1993 | 74 | NA    | NA    |
| CMC_PENN_066 | Penn | SCZ | Female | Caucasian | 1200 | 15   | 5.83 | 1993 | 75 | NA    | NA    |
| CMC_PENN_067 | Penn | SCZ | Female | Caucasian | 1018 | 20   | 6.73 | 1994 | 78 | NA    | NA    |
| CMC_PENN_068 | Penn | SCZ | Male   | Caucasian | 1300 | 7    | 6.07 | 1993 | 79 | NA    | NA    |
| CMC_PENN_070 | Penn | SCZ | Female | Caucasian | 1100 | 6    | NA   | 2005 | 90 | 60    | 163.1 |
| CMC_PENN_071 | Penn | SCZ | Female | Caucasian | 1270 | 6.5  | 6.7  | 1993 | 87 | NA    | NA    |
| CMC_PENN_072 | Penn | SCZ | Female | Caucasian | 1200 | 7.5  | 6.58 | 1994 | 88 | NA    | NA    |
| CMC_PENN_073 | Penn | SCZ | Female | Caucasian | 1100 | 12   | 6.19 | 1994 | 86 | NA    | NA    |
| CMC_PENN_074 | Penn | SCZ | Female | Caucasian | 1020 | 11.5 | 6.7  | 1992 | 72 | NA    | NA    |
| CMC_PENN_075 | Penn | SCZ | Male   | Caucasian | 1382 | 7    | 6.63 | 1995 | 82 | NA    | NA    |
| CMC_PENN_082 | Penn | SCZ | Male   | Caucasian | 1338 | 17   | NA   | 2007 | 77 | NA    | NA    |
| CMC_PENN_089 | Penn | SCZ | Male   | Caucasian | 1100 | 20   | 6.55 | 2005 | 81 | NA    | NA    |
| CMC_PENN_090 | Penn | SCZ | Female | Caucasian | 1325 | 13   | 6.47 | 1994 | 81 | NA    | NA    |
| CMC_PENN_091 | Penn | SCZ | Female | Caucasian | 976  | 16   | 5.87 | 1995 | 90 | NA    | NA    |
| CMC_PENN_092 | Penn | SCZ | Male   | Caucasian | 1240 | 10.5 | 6.28 | 1993 | 90 | NA    | NA    |
| CMC_PENN_093 | Penn | SCZ | Male   | Caucasian | 1311 | 12   | 6.81 | 1996 | 75 | NA    | NA    |
| CMC_PENN_094 | Penn | SCZ | Female | Caucasian | 1086 | 11   | 6.92 | 1996 | 86 | NA    | NA    |
| CMC_PENN_095 | Penn | SCZ | Female | Caucasian | 978  | 12.5 | NA   | 2003 | 89 | 59.45 | 140   |
| CMC_PENN_096 | Penn | SCZ | Male   | Caucasian | 1188 | 10   | 6.64 | 1994 | 71 | NA    | NA    |
| CMC_PENN_097 | Penn | SCZ | Male   | Caucasian | 1200 | 16.5 | 6.13 | 1993 | 70 | NA    | NA    |
| CMC_PENN_098 | Penn | SCZ | Male   | Caucasian | 1080 | 8.5  | 6.77 | 1994 | 90 | NA    | NA    |
| CMC_PENN_099 | Penn | SCZ | Male   | Caucasian | 1200 | 7    | 6.61 | 1992 | 83 | 67.72 | 85    |
| CMC_PENN_100 | Penn | SCZ | Female | Caucasian | 1100 | 7    | 6.32 | 1993 | 82 | NA    | NA    |
| CMC_PENN_101 | Penn | SCZ | Male   | Caucasian | 1260 | 14   | 6.66 | 1993 | 74 | NA    | NA    |
| CMC_PITT_003 | Pitt | SCZ | Male   | Caucasian | 1500 | 28.8 | 6.6  | 2004 | 38 | 68    | 130   |
| CMC_PITT_007 | Pitt | SCZ | Female | Caucasian | 1300 | 23.8 | 6.6  | 2004 | 46 | 62.5  | 115.5 |
| CMC_PITT_011 | Pitt | SCZ | Male   | Caucasian | 1530 | 21.5 | 6.4  | 2003 | 49 | 71    | 194   |
| CMC_PITT_014 | Pitt | SCZ | Male   | Caucasian | 1220 | 7.9  | 6.2  | 2003 | 53 | 66    | 188   |

|              |      |     |        |           |      |      |     |      |    |      |     |
|--------------|------|-----|--------|-----------|------|------|-----|------|----|------|-----|
| CMC_PITT_017 | Pitt | SCZ | Male   | Caucasian | 1315 | 22.9 | 6.4 | 2003 | 62 | 71   | 164 |
| CMC_PITT_019 | Pitt | SCZ | Male   | Caucasian | 1575 | 7.7  | 6.2 | 2004 | 58 | 69   | 117 |
| CMC_PITT_020 | Pitt | SCZ | Female | Caucasian | 1285 | 14.4 | 6.4 | 2004 | 47 | 66   | 234 |
| CMC_PITT_023 | Pitt | SCZ | Male   | Caucasian | 1695 | 9.1  | 6.5 | 2004 | 35 | 71   | 202 |
| CMC_PITT_024 | Pitt | SCZ | Female | Caucasian | 1365 | 20.1 | 6.3 | 2004 | 41 | 64   | 189 |
| CMC_PITT_025 | Pitt | SCZ | Male   | Caucasian | 1400 | 30.8 | 6.4 | 2004 | 32 | 71.5 | 231 |
| CMC_PITT_026 | Pitt | SCZ | Male   | Caucasian | 1550 | 16.9 | 6.6 | 2004 | 50 | 64   | 186 |
| CMC_PITT_029 | Pitt | SCZ | Male   | Caucasian | 1560 | 27.4 | 6.4 | 2004 | 34 | 73   | 168 |
| CMC_PITT_030 | Pitt | SCZ | Male   | Caucasian | 1315 | 22.7 | 7.1 | 2005 | 62 | 67   | 114 |
| CMC_PITT_037 | Pitt | SCZ | Male   | Caucasian | 1215 | 11   | 6.2 | 2005 | 50 | 69   | 150 |
| CMC_PITT_041 | Pitt | SCZ | Female | Caucasian | 1175 | 24.5 | 6.6 | 2006 | 44 | 65   | 115 |
| CMC_PITT_043 | Pitt | SCZ | Male   | Caucasian | 1335 | 23.2 | 6.4 | 2006 | 63 | 69   | 181 |
| CMC_PITT_044 | Pitt | SCZ | Male   | Caucasian | 1465 | 28.9 | 6.6 | 2006 | 47 | 69   | 232 |
| CMC_PITT_049 | Pitt | SCZ | Male   | Caucasian | 1535 | 23.4 | 6.7 | 2007 | 47 | 70   | 225 |
| CMC_PITT_051 | Pitt | SCZ | Male   | Caucasian | 1500 | 11.1 | 6.4 | 2007 | 62 | 72   | 172 |
| CMC_PITT_052 | Pitt | SCZ | Male   | Caucasian | 1600 | 24.1 | 6.1 | 2007 | 59 | 68   | 213 |
| CMC_PITT_053 | Pitt | SCZ | Male   | Caucasian | 1550 | 8.2  | 6.2 | 2007 | 42 | 68   | 185 |
| CMC_PITT_056 | Pitt | SCZ | Male   | Caucasian | 1655 | 39.9 | 6.7 | 2008 | 37 | 72   | 236 |
| CMC_PITT_057 | Pitt | SCZ | Female | Caucasian | 1515 | 14.1 | 6.6 | 2008 | 47 | 63   | 275 |
| CMC_PITT_060 | Pitt | SCZ | Male   | Caucasian | 1550 | 17.4 | 6.7 | 2009 | 65 | 72   | 220 |
| CMC_PITT_065 | Pitt | SCZ | Female | Caucasian | 1315 | 16.1 | 6.7 | 2009 | 69 | 60.5 | 119 |
| CMC_PITT_066 | Pitt | SCZ | Male   | Caucasian | 1320 | 18.4 | 6.8 | 2009 | 32 | 73   | 240 |
| CMC_PITT_071 | Pitt | SCZ | Male   | Caucasian | 1310 | 31.9 | 6.6 | 2011 | 51 | 72   | 254 |
| CMC_PITT_073 | Pitt | SCZ | Male   | Caucasian | 1370 | 15.1 | 6.2 | 2011 | 63 | 73   | 251 |
| CMC_PITT_074 | Pitt | SCZ | Male   | Caucasian | 1340 | 28.6 | 6.1 | 2012 | 54 | 77   | 192 |
| CMC_PITT_077 | Pitt | SCZ | Male   | Caucasian | 1480 | 28.6 | 6.8 | 1995 | 40 | NA   | NA  |
| CMC_PITT_079 | Pitt | SCZ | Male   | Caucasian | 1645 | 40.5 | 7.1 | 1995 | 50 | NA   | NA  |
| CMC_PITT_083 | Pitt | SCZ | Male   | Caucasian | 1420 | 18.3 | 6.8 | 1995 | 63 | 69   | 109 |
| CMC_PITT_085 | Pitt | SCZ | Male   | Caucasian | 1390 | 30.2 | 7.2 | 1996 | 46 | 65   | 158 |
| CMC_PITT_089 | Pitt | SCZ | Male   | Caucasian | 1315 | 16   | 7.3 | 1996 | 83 | 66   | 140 |
| CMC_PITT_090 | Pitt | SCZ | Male   | Caucasian | 1505 | 18.9 | 6.8 | 1996 | 58 | 69   | 234 |
| CMC_PITT_094 | Pitt | SCZ | Male   | Caucasian | 1260 | 4.5  | 6.9 | 1996 | 49 | 74   | 240 |
| CMC_PITT_107 | Pitt | SCZ | Female | Caucasian | 1315 | 29   | 6.4 | 1999 | 63 | 67   | 161 |
| CMC_PITT_111 | Pitt | SCZ | Male   | Caucasian | 1160 | 5    | 6.8 | 1999 | 25 | 66   | 150 |
| CMC_PITT_117 | Pitt | SCZ | Male   | Caucasian | 1565 | 28   | 6.2 | 2000 | 33 | 71   | 275 |
| CMC_PITT_118 | Pitt | SCZ | Female | Caucasian | 1150 | 23.8 | 6.8 | 2000 | 71 | 65   | 153 |
| CMC_PITT_120 | Pitt | SCZ | Male   | Caucasian | 1495 | 8.3  | 5.9 | 2001 | 44 | 72   | 336 |
